# Supplementary material
Source: PubMed Central journal article supplement (PMC4210159)
Supplement: om5004682_si_001.pdf [file om5004682_si_001.pdf]

**Stoichiometric Reactions of Acylnickel(II) Complexes with  
Electrophiles and the Catalytic Synthesis of Ketones**

Alexander C. Wotal, Ryan D. Ribson, and Daniel J. Weix\*

Department of Chemistry, University of Rochester, Rochester, NY, USA

14627-0216

Supporting Information

## Table of Contents

|     |                                                              |     |
|-----|--------------------------------------------------------------|-----|
| I.  | Supplementary Tables and Figure                              | S3  |
|     | Table S1 – Full product distribution for Table 2             | S3  |
|     | Table S2 – Full product distribution for Table 3             | S4  |
|     | Pictures of the the reaction of <b>1c</b> with electrophiles | S5  |
| II. | Spectra                                                      | S7  |
|     | dtbbpy <sup>1</sup> H NMR                                    | S8  |
|     | Ni(cod) <sub>2</sub> <sup>1</sup> H NMR                      | S9  |
|     | Compound <b>3</b> <sup>1</sup> H NMR                         | S10 |
|     | Compound <b>3</b> <sup>1</sup> H paramagnetic NMR            | S11 |
|     | Compound <b>1b</b> <sup>1</sup> H NMR                        | S12 |
|     | Compound <b>1b</b> <sup>1</sup> H paramagnetic NMR           | S13 |
|     | Compound <b>1c</b> <sup>1</sup> H NMR                        | S14 |
|     | Compound <b>1c</b> <sup>1</sup> H paramagnetic NMR           | S15 |
|     | Compound <b>22</b> <sup>1</sup> H NMR                        | S16 |
|     | Compound <b>22</b> <sup>13</sup> C NMR                       | S17 |
|     | Compound <b>23</b> <sup>1</sup> H NMR                        | S18 |
|     | Compound <b>23</b> <sup>13</sup> C NMR                       | S19 |
|     | Compound <b>24</b> <sup>1</sup> H NMR                        | S20 |
|     | Compound <b>24</b> <sup>13</sup> C NMR                       | S21 |
|     | Compound <b>25</b> <sup>1</sup> H NMR                        | S22 |
|     | Compound <b>25</b> <sup>13</sup> C NMR                       | S23 |
|     | Compound <b>25</b> <sup>19</sup> F NMR                       | S24 |
|     | Compound <b>26</b> <sup>1</sup> H NMR                        | S25 |
|     | Compound <b>26</b> <sup>13</sup> C NMR                       | S26 |
|     | Compound <b>26</b> <sup>19</sup> F NMR                       | S27 |
|     | Compound <b>27</b> <sup>1</sup> H NMR                        | S28 |
|     | Compound <b>27</b> <sup>13</sup> C NMR                       | S29 |

## I. Supplementary Tables

Table S1. Full Data From Table 2.<sup>a</sup>

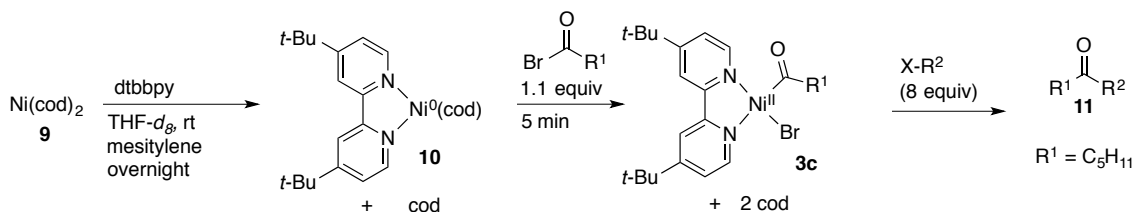

| X-R <sub>2</sub><br>time, temp       | R <sub>1</sub> -R <sub>2</sub> | R <sub>1</sub> -C(=O)-R <sub>2</sub> | R <sub>1</sub> -C(=O)-R <sub>2</sub> | R <sub>1</sub> -R <sub>1</sub> | R <sub>1</sub> -C(=O)-R <sub>1</sub> | R <sub>1</sub> -C(=O)-R <sub>1</sub> | R <sub>2</sub> -R <sub>2</sub> | R <sub>2</sub> -C(=O)-R <sub>2</sub> | R <sub>2</sub> -C(=O)-R <sub>2</sub> |
|--------------------------------------|--------------------------------|--------------------------------------|--------------------------------------|--------------------------------|--------------------------------------|--------------------------------------|--------------------------------|--------------------------------------|--------------------------------------|
| <br>< 14 h, 60 °C)                   | ND                             | 12                                   | ND                                   | ND                             | 3                                    | 11                                   | 23                             | 8                                    | 11                                   |
| <br>< 5 mins, rt.                    | ND                             | 54                                   | ND                                   | ND                             | 1                                    | 3                                    | 15                             | ND                                   | ND                                   |
| Br- <i>n</i> -octyl<br>< 14 h, 60 °C | ND                             | 17                                   | ND                                   | ND                             | <1                                   | 4                                    | ND                             | 12                                   | ND                                   |
| I- <i>n</i> -octyl<br>< 12 h, 60 °C  | ND                             | 33                                   | ND                                   | ND                             | 3                                    | 2                                    | 0                              | 18                                   | ND                                   |

As above but with zinc flake (8.4 eq):

| X-R <sub>2</sub><br>time, temp       | R <sub>1</sub> -R <sub>2</sub> | R <sub>1</sub> -C(=O)-R <sub>2</sub> | R <sub>1</sub> -C(=O)-R <sub>2</sub> | R <sub>1</sub> -R <sub>1</sub> | R <sub>1</sub> -C(=O)-R <sub>1</sub> | R <sub>1</sub> -C(=O)-R <sub>1</sub> | R <sub>2</sub> -R <sub>2</sub> | R <sub>2</sub> -C(=O)-R <sub>2</sub> | R <sub>2</sub> -C(=O)-R <sub>2</sub> |
|--------------------------------------|--------------------------------|--------------------------------------|--------------------------------------|--------------------------------|--------------------------------------|--------------------------------------|--------------------------------|--------------------------------------|--------------------------------------|
| <br>< 12 h, 60 °C)                   | ND                             | 22                                   | ND                                   | ND                             | 3                                    | ND                                   | 461                            | 13                                   | ND                                   |
| <br>5 mins, rt.                      | ND                             | 44                                   | ND                                   | ND                             | <1                                   | <1                                   | 613                            | ND                                   | ND                                   |
| Br- <i>n</i> -octyl<br>< 14 h, 60 °C | ND                             | 31                                   | ND                                   | ND                             | 3                                    | 2                                    | 165                            | 20                                   | ND                                   |

<sup>a</sup> R<sup>1</sup> = C<sub>5</sub>H<sub>11</sub>. ND = not detected by GC analysis. In all cases, yields are calculated vs. amount of Ni(cod)<sub>2</sub> added in the first step. Yields are *uncorrected* GC yields vs. mesitylene internal standard, so >100% total yield for all products could be observed. For reactions with added reductant, >100% yields are possible because the nickel can turnover.

**Table S2. Full Data From Table 3.**

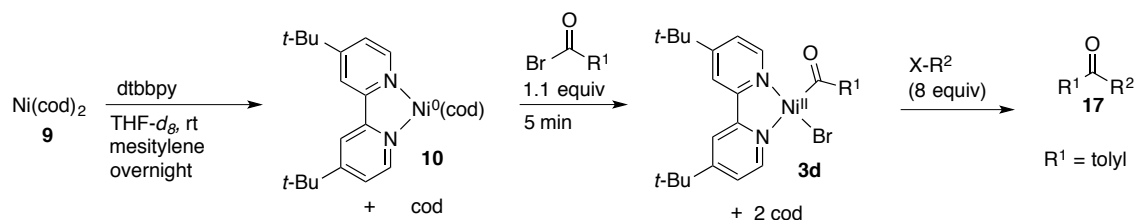

| X-R <sub>2</sub><br>time, temp | R <sub>1</sub> -R <sub>2</sub> |    | R <sub>1</sub> -C(=O)-R <sub>2</sub> |    | R <sub>1</sub> -C(=O)-C(=O)-R <sub>2</sub> |    | R <sub>1</sub> -R <sub>1</sub> |    | R <sub>1</sub> -C(=O)-R <sub>1</sub> |    | R <sub>1</sub> -C(=O)-C(=O)-R <sub>1</sub> |  | R <sub>2</sub> -R <sub>2</sub> |  | R <sub>2</sub> -C(=O)-R <sub>2</sub> |  | R <sub>2</sub> -C(=O)-C(=O)-R <sub>2</sub> |  | R <sup>1</sup> -H |  |
|--------------------------------|--------------------------------|----|--------------------------------------|----|--------------------------------------------|----|--------------------------------|----|--------------------------------------|----|--------------------------------------------|--|--------------------------------|--|--------------------------------------|--|--------------------------------------------|--|-------------------|--|
|                                | Ph-Br<br>< 12 h, 60 °C)        | 3  | 25                                   | 4  | 1                                          | 23 | 8                              | 5  | 21                                   | ND | 1                                          |  |                                |  |                                      |  |                                            |  |                   |  |
| Ph-Cl<br>< 12 h, 60 °C)        | ND                             | 94 | ND                                   | ND | 5                                          | 2  | 21                             | ND | ND                                   | 7  |                                            |  |                                |  |                                      |  |                                            |  |                   |  |
| I-n-octyl<br>1h, rt.           | ND                             | 60 | ND                                   | 3  | 5                                          | <1 | ND                             | 8  | ND                                   | 2  |                                            |  |                                |  |                                      |  |                                            |  |                   |  |

**With Zinc -325 mesh flake 20 mg, 8.4 mmol:**

| X-R <sub>2</sub><br>time, temp | R <sub>1</sub> -R <sub>2</sub> |    | R <sub>1</sub> -C(=O)-R <sub>2</sub> |    | R <sub>1</sub> -C(=O)-C(=O)-R <sub>2</sub> |    | R <sub>1</sub> -R <sub>1</sub> |     | R <sub>1</sub> -C(=O)-R <sub>1</sub> |    | R <sub>1</sub> -C(=O)-C(=O)-R <sub>1</sub> |  | R <sub>2</sub> -R <sub>2</sub> |  | R <sub>2</sub> -C(=O)-R <sub>2</sub> |  | R <sub>2</sub> -C(=O)-C(=O)-R <sub>2</sub> |  | R <sup>1</sup> -H |  |
|--------------------------------|--------------------------------|----|--------------------------------------|----|--------------------------------------------|----|--------------------------------|-----|--------------------------------------|----|--------------------------------------------|--|--------------------------------|--|--------------------------------------|--|--------------------------------------------|--|-------------------|--|
|                                | Ph-Br<br>< 12 h, 60 °C)        | 35 | 25                                   | 4  | 6                                          | 30 | ND                             | 500 | 26                                   | ND | 1                                          |  |                                |  |                                      |  |                                            |  |                   |  |
| Ph-Cl<br>< 12 h, 60 °C)        | ND                             | 87 | ND                                   | ND | ND                                         | ND | 612                            | ND  | ND                                   | 3  |                                            |  |                                |  |                                      |  |                                            |  |                   |  |
| I-n-octyl<br>1h, rt.           | ND                             | 58 | ND                                   | <1 | ND                                         | <1 | ND                             | 58  | ND                                   | 4  |                                            |  |                                |  |                                      |  |                                            |  |                   |  |

<sup>a</sup> R<sup>1</sup> = p-tolyl. ND = not detected by GC analysis. In all cases, yields are calculated vs. amount of Ni(cod)<sub>2</sub> added in the first step. Yields are *uncorrected* GC yields vs. mesitylene internal standard, so >100% total yield for all products could be observed. For reactions with added reductant, >100% yields are possible because the nickel can turnover.

Figure S1. Pictures of the formation and reaction of  $(dtbbpy)Ni^{II}(C(O)tolyl)(Br)$  (**1c**) with RX (Table 3).

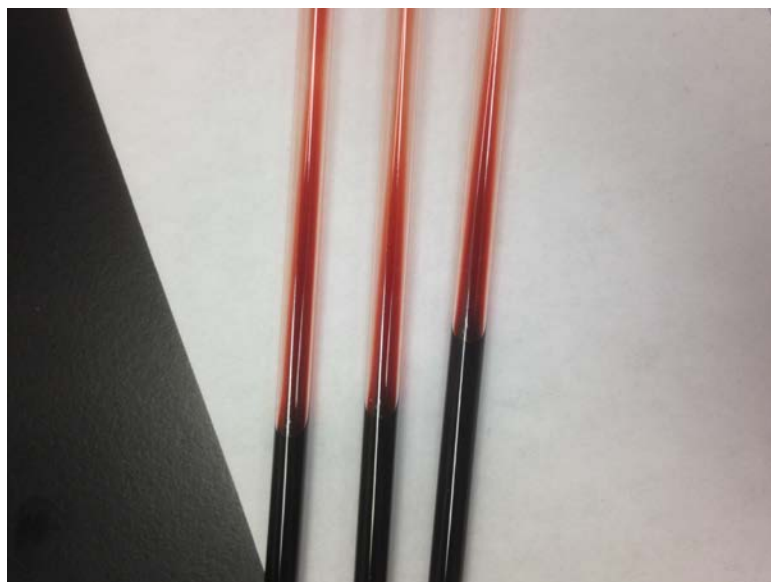

Complex **1c** in THF- $d_8$ .

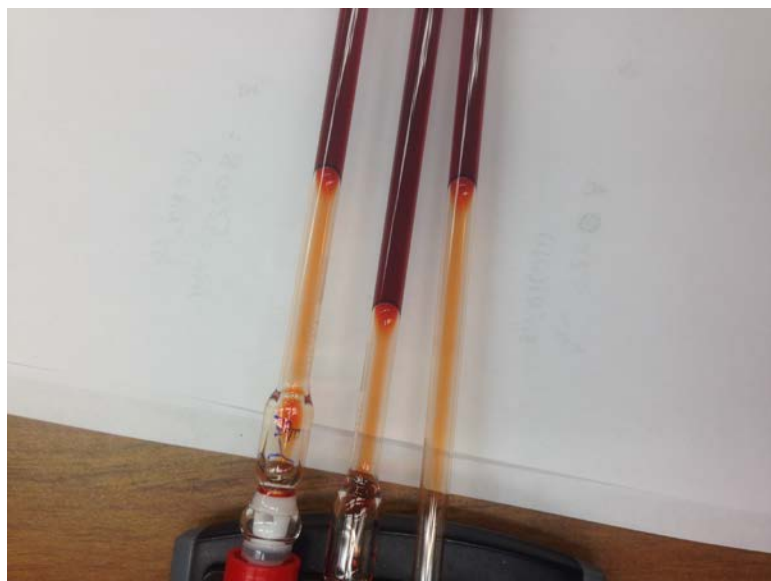

Reaction mixtures immediately after adding in DMA and the electrophile (RX).

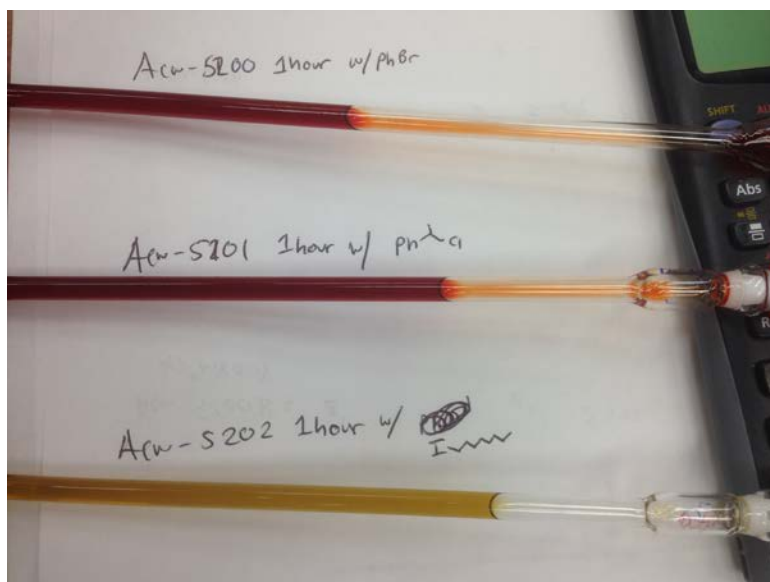

Reaction colors after 1 h reaction time.

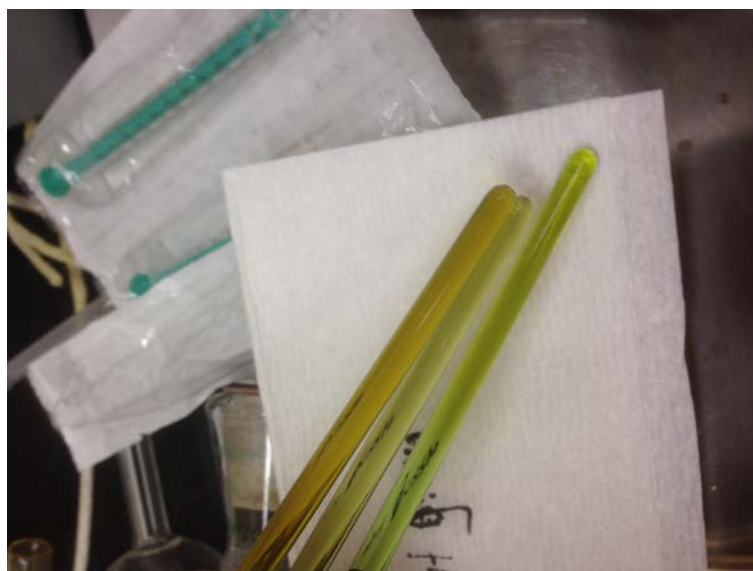

Reaction mixtures after completion.

## II. Spectra

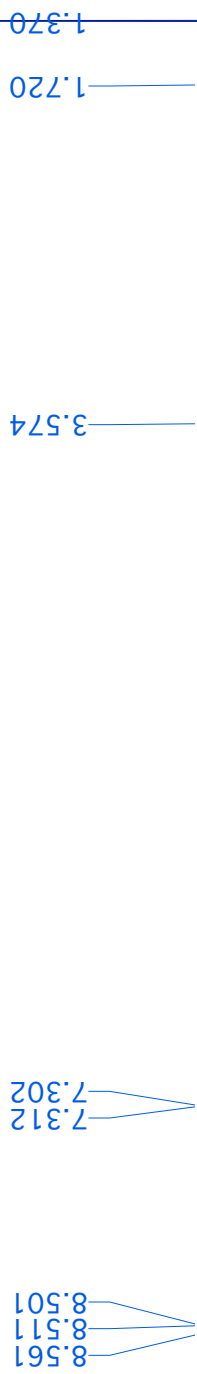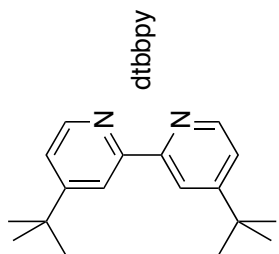

<sup>1</sup>H NMR, THF-d8

Pulse Sequence: zg  
 Spectrometer Freq.: 500.13 MHz  
 Spectral Width: 19.99 ppm  
 Number of Scans: 2  
 Relaxation Delay: 12.000 s



$\text{Ni}(\text{cod})_2$   
 $^1\text{H}$  NMR, THF-d8

Pulse Sequence: zg  
Spectrometer Freq.: 500.13 MHz  
Spectral Width: 19.99 ppm  
Number of Scans: 1  
Relaxation Delay: 1.000 s

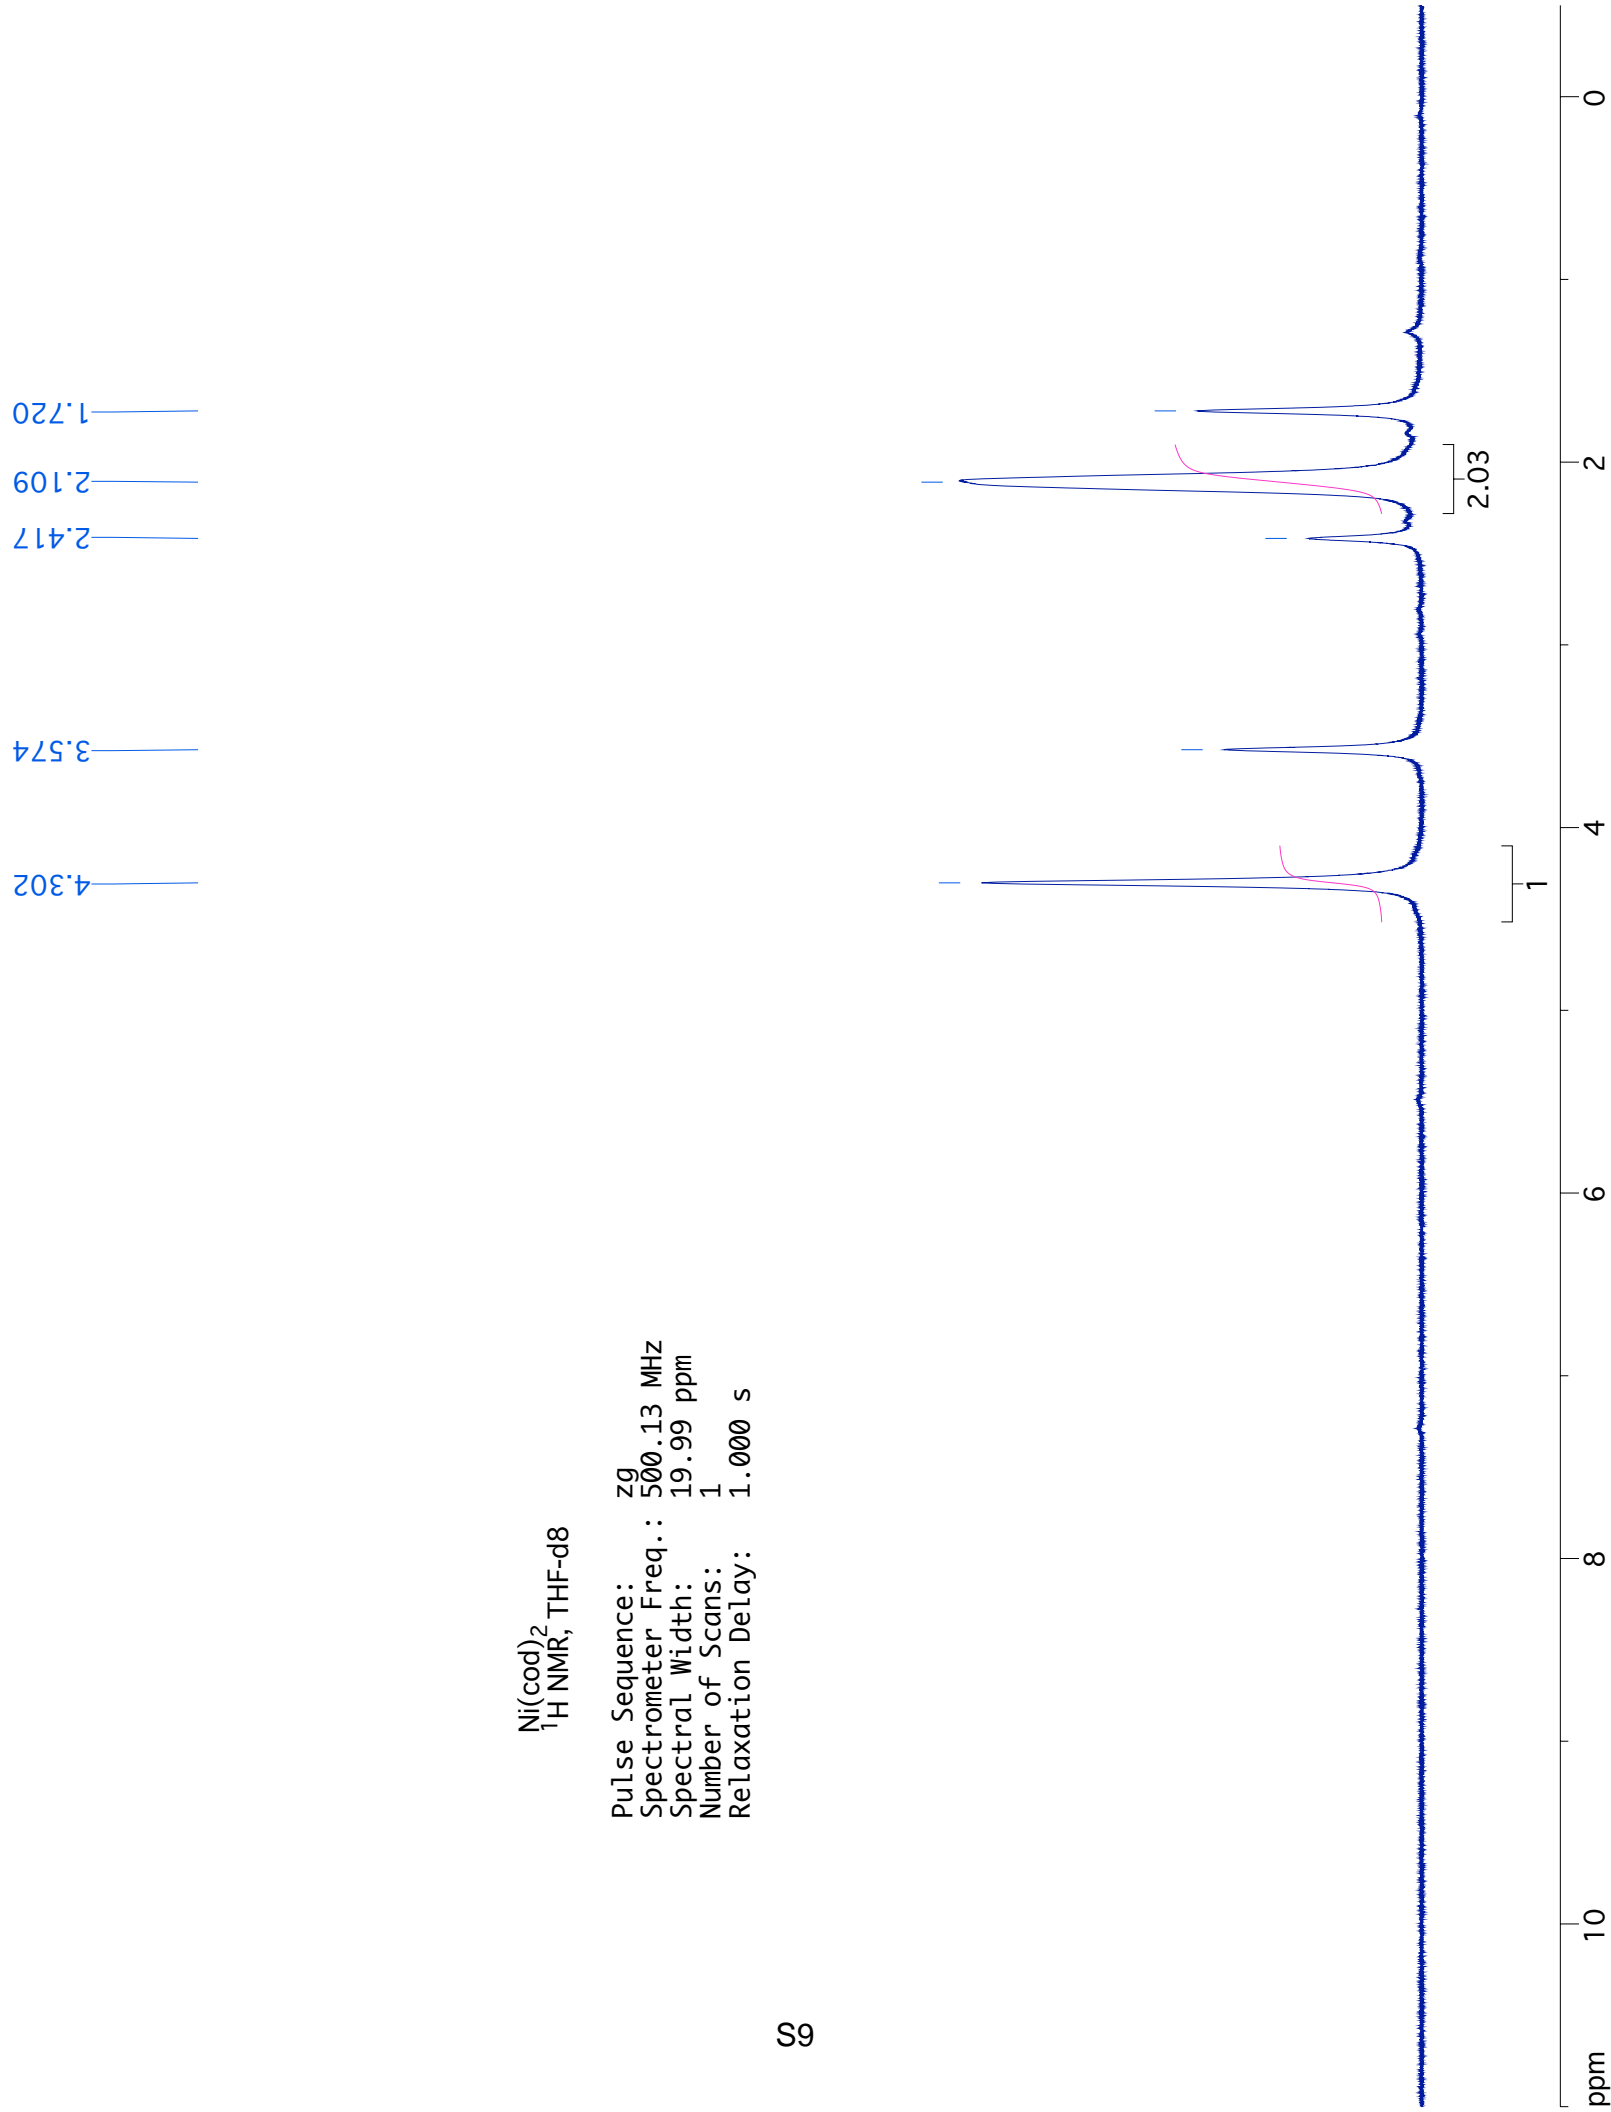

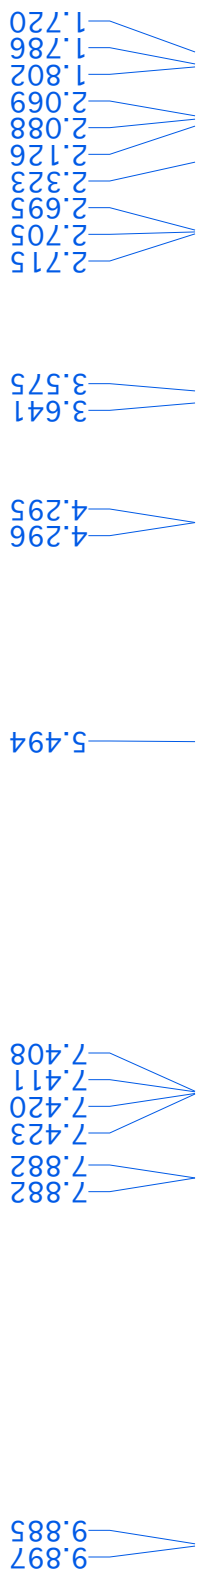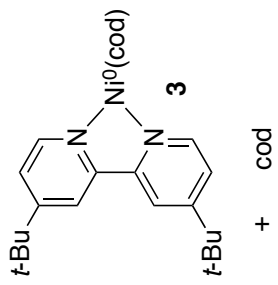

<sup>1</sup>H NMR, THF-d8

Pulse Sequence: zg  
 Spectrometer Freq.: 500.13 MHz  
 Spectral Width: 19.99 ppm  
 Number of Scans: 8  
 Relaxation Delay: 12.000 s

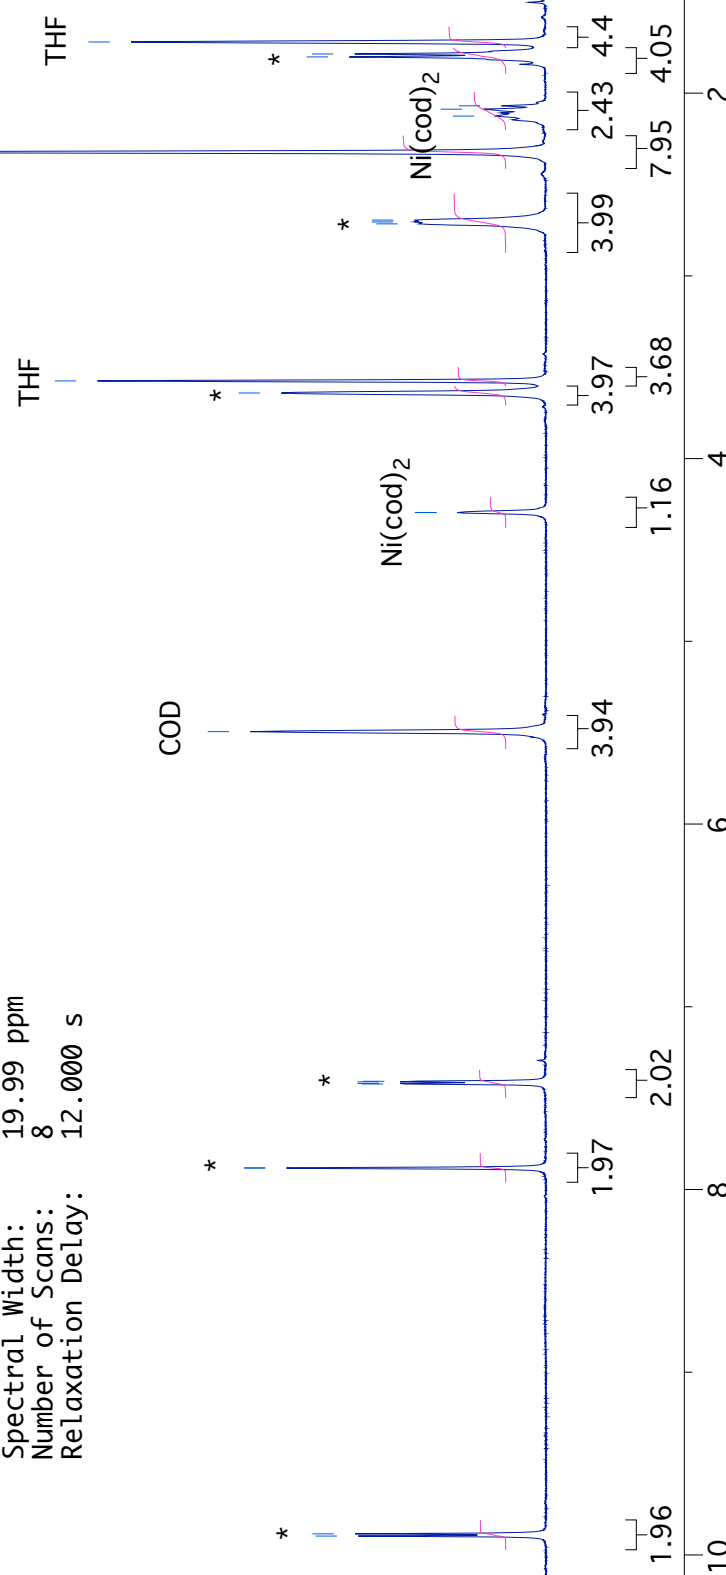

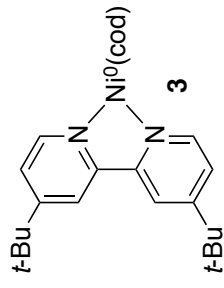

+ cod

paramagnetic  $^1\text{H}$  NMR, THF-d8

S11

Pulse Sequence: zg  
Spectrometer Freq.: 500.10 MHz  
Spectral Width: 605.93 ppm  
Number of Scans: 32  
Relaxation Delay: 0.500 s

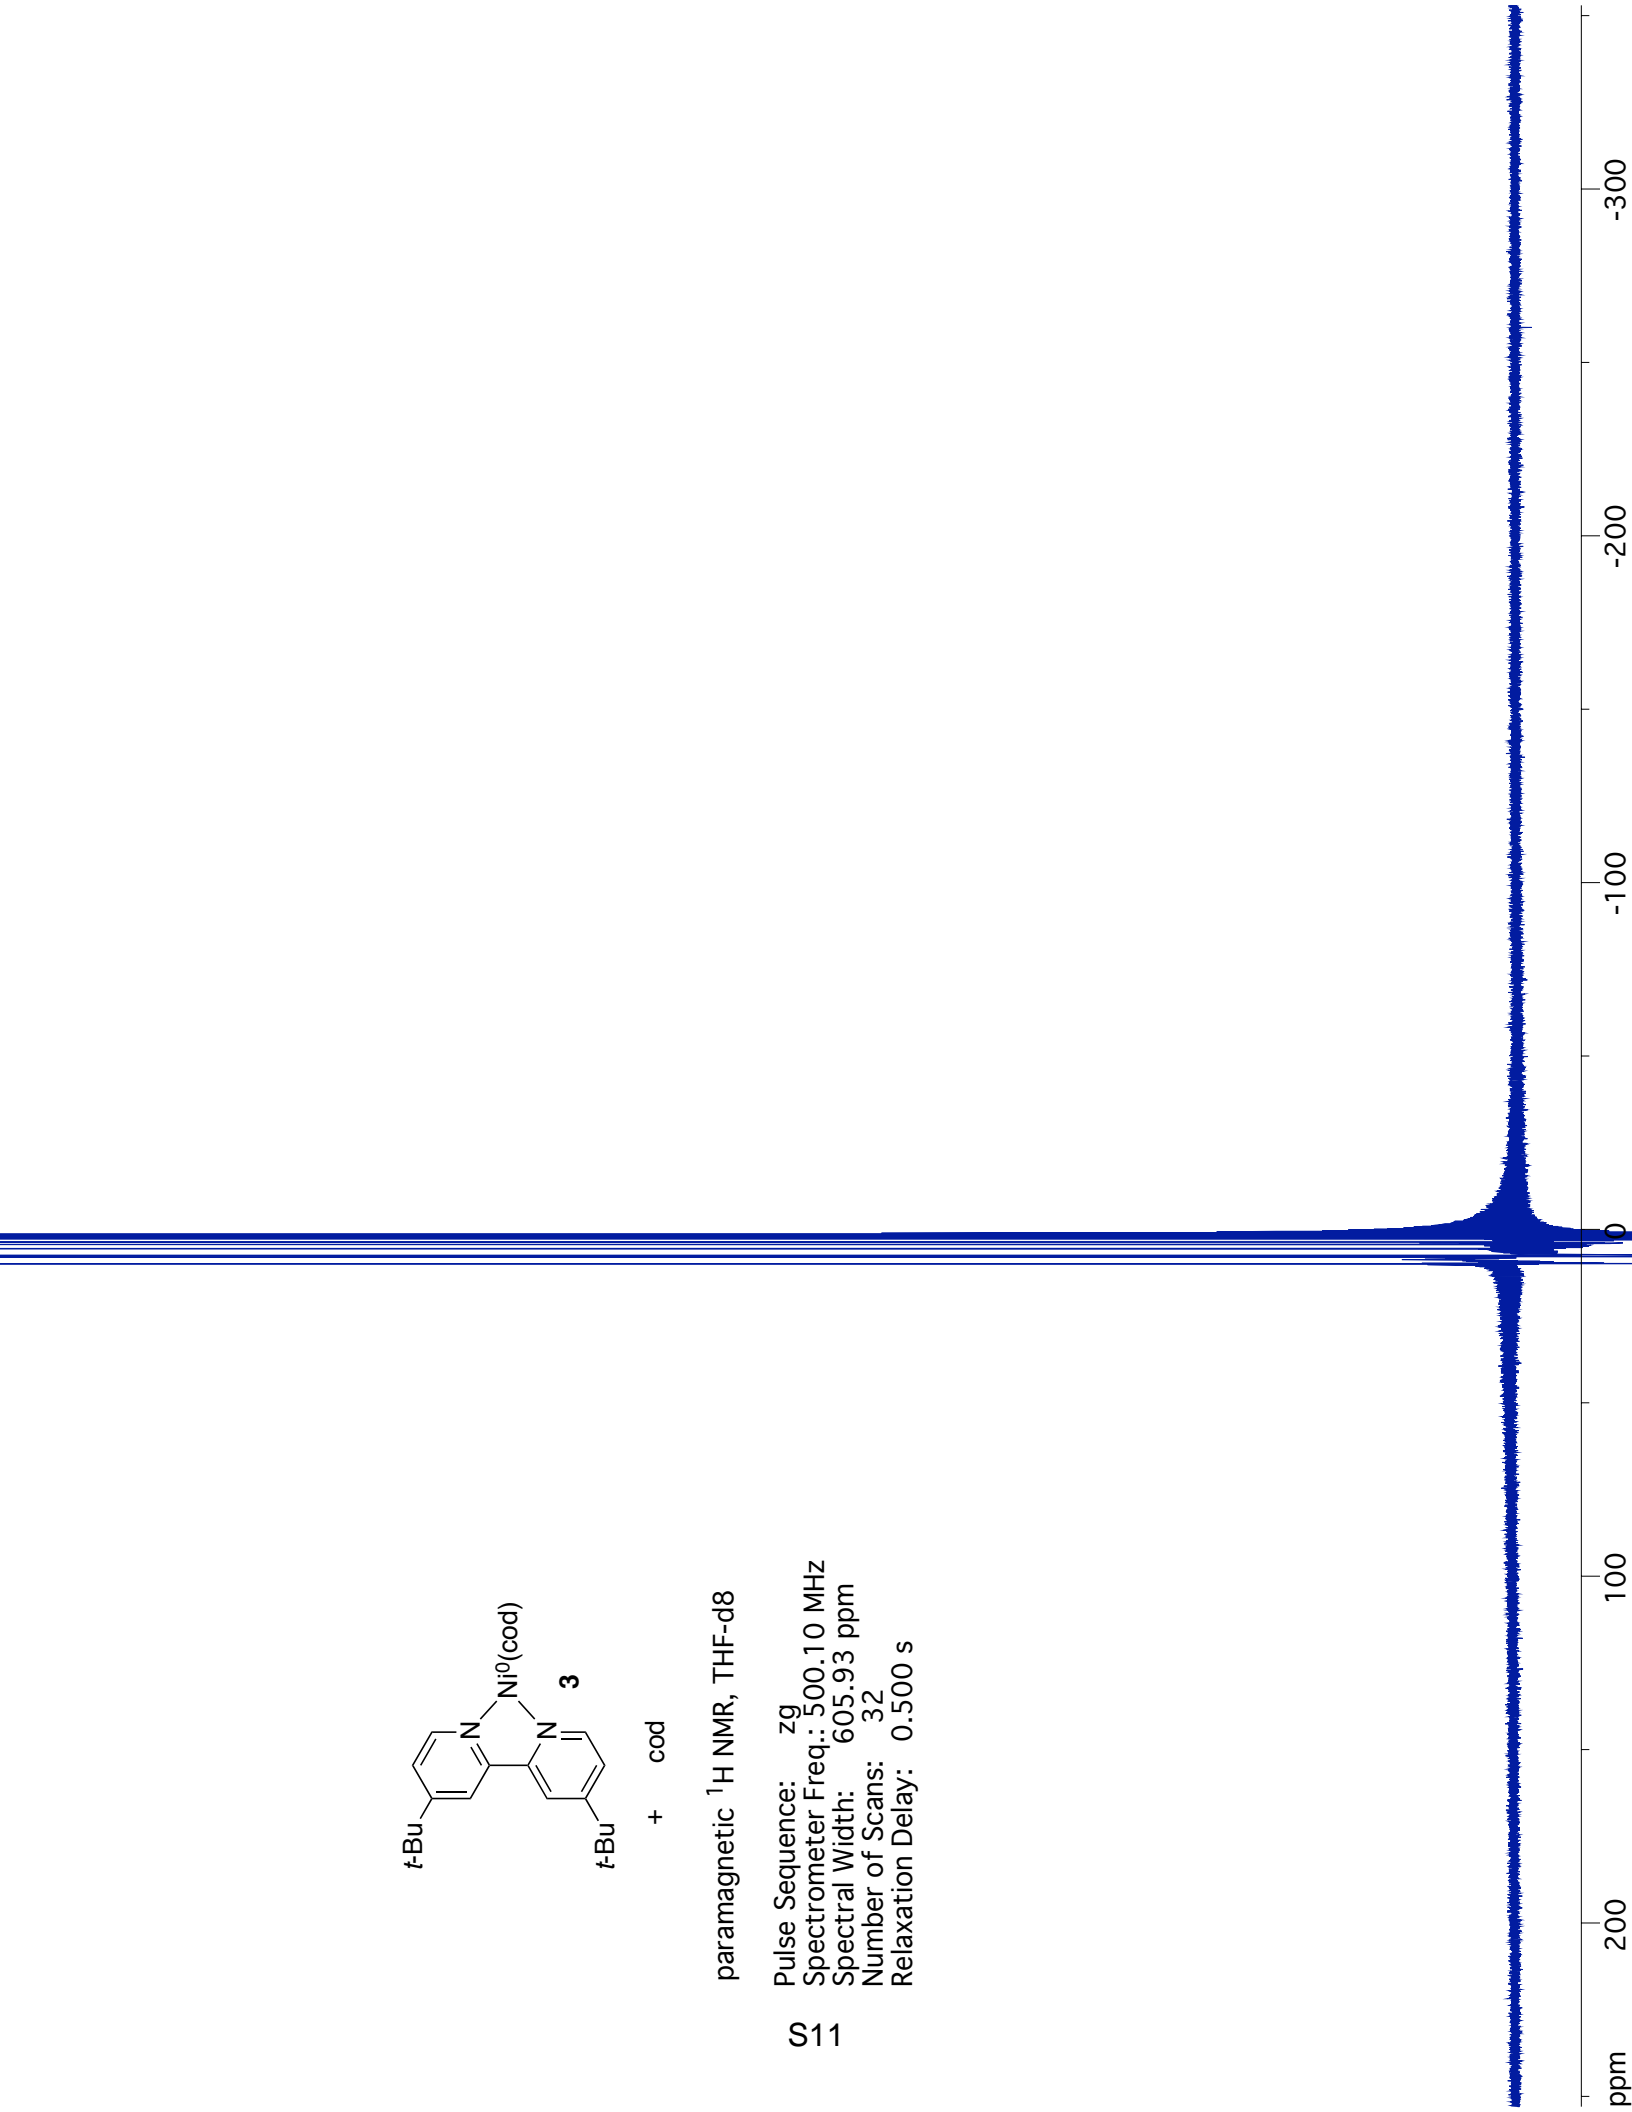

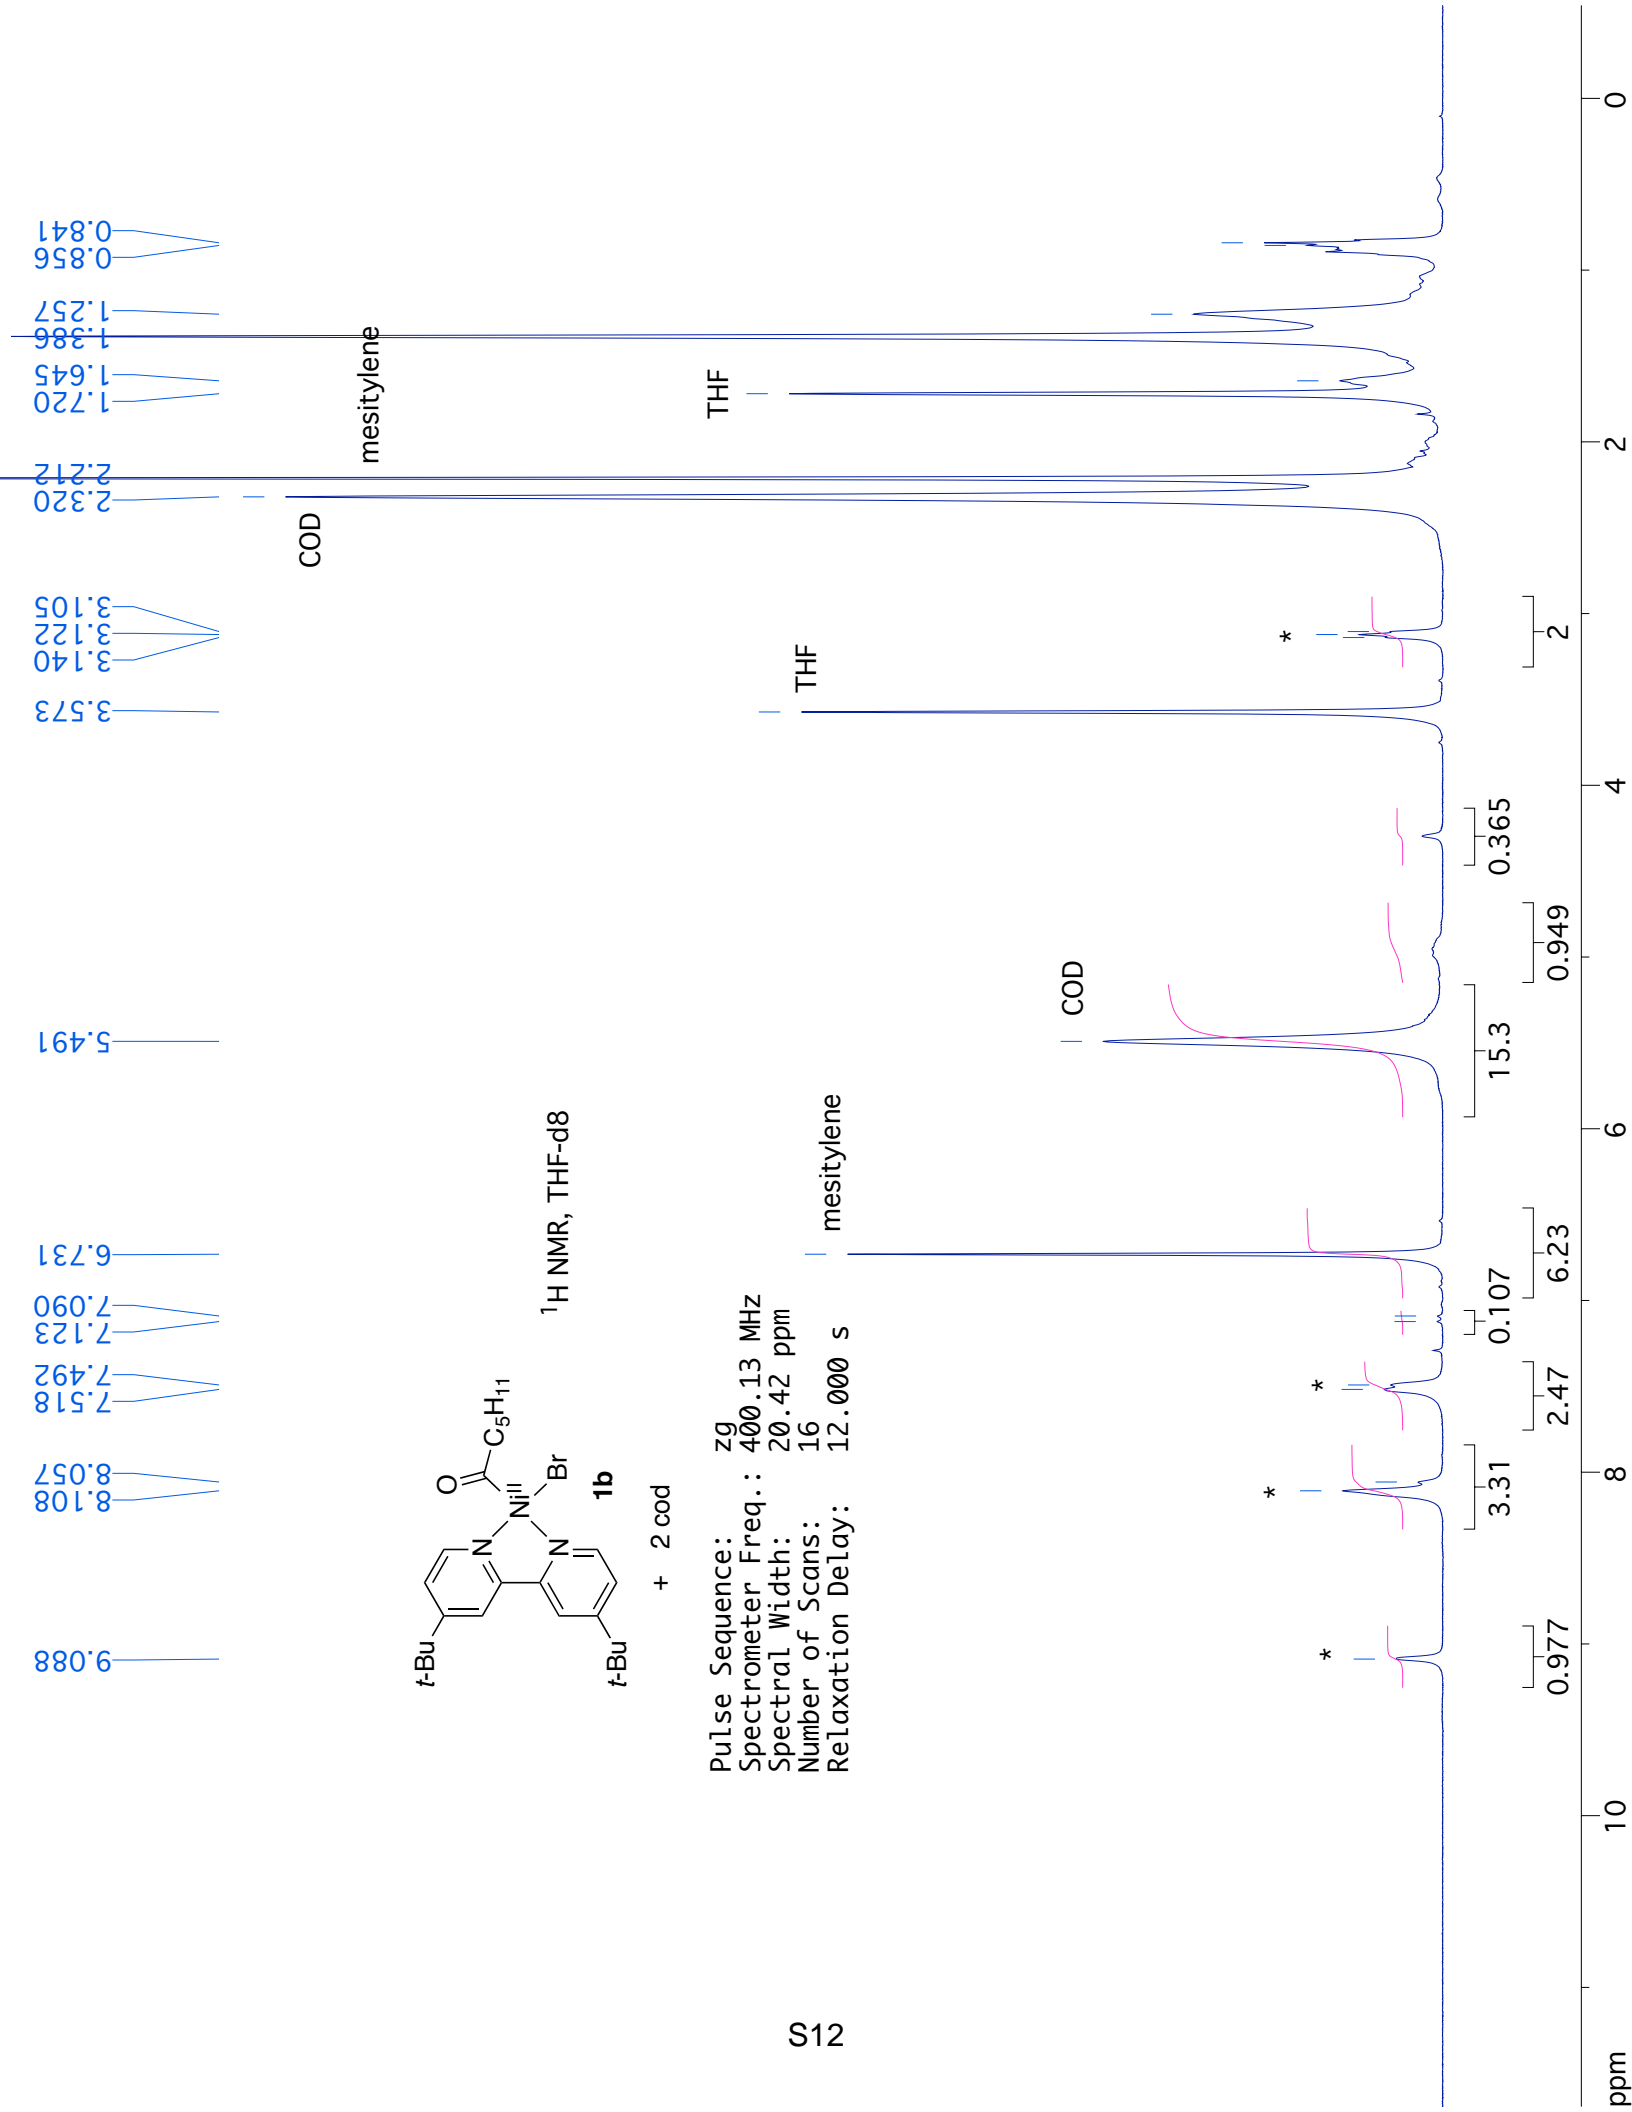

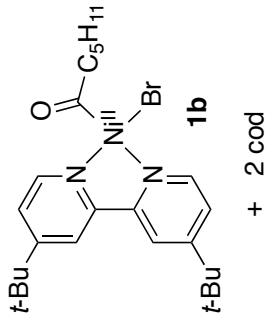

paramagnetic <sup>1</sup>H NMR, THF-d8

Pulse Sequence: zg  
 Spectrometer Freq.: 400.11 MHz  
 Spectral Width: 504.91 ppm  
 Number of Scans: 355  
 Relaxation Delay: 0.150 s

57.729  
 40.679  
 -11.440

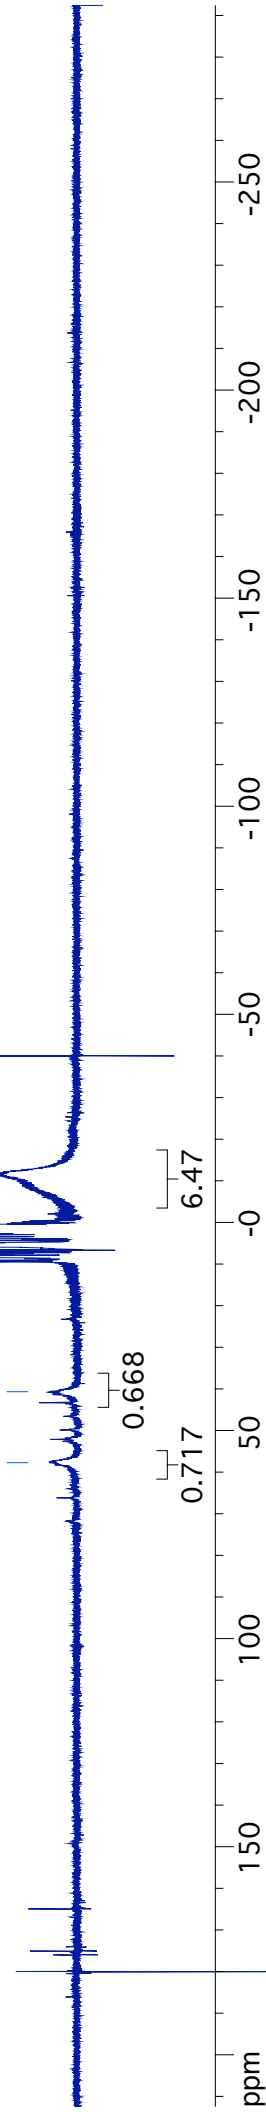

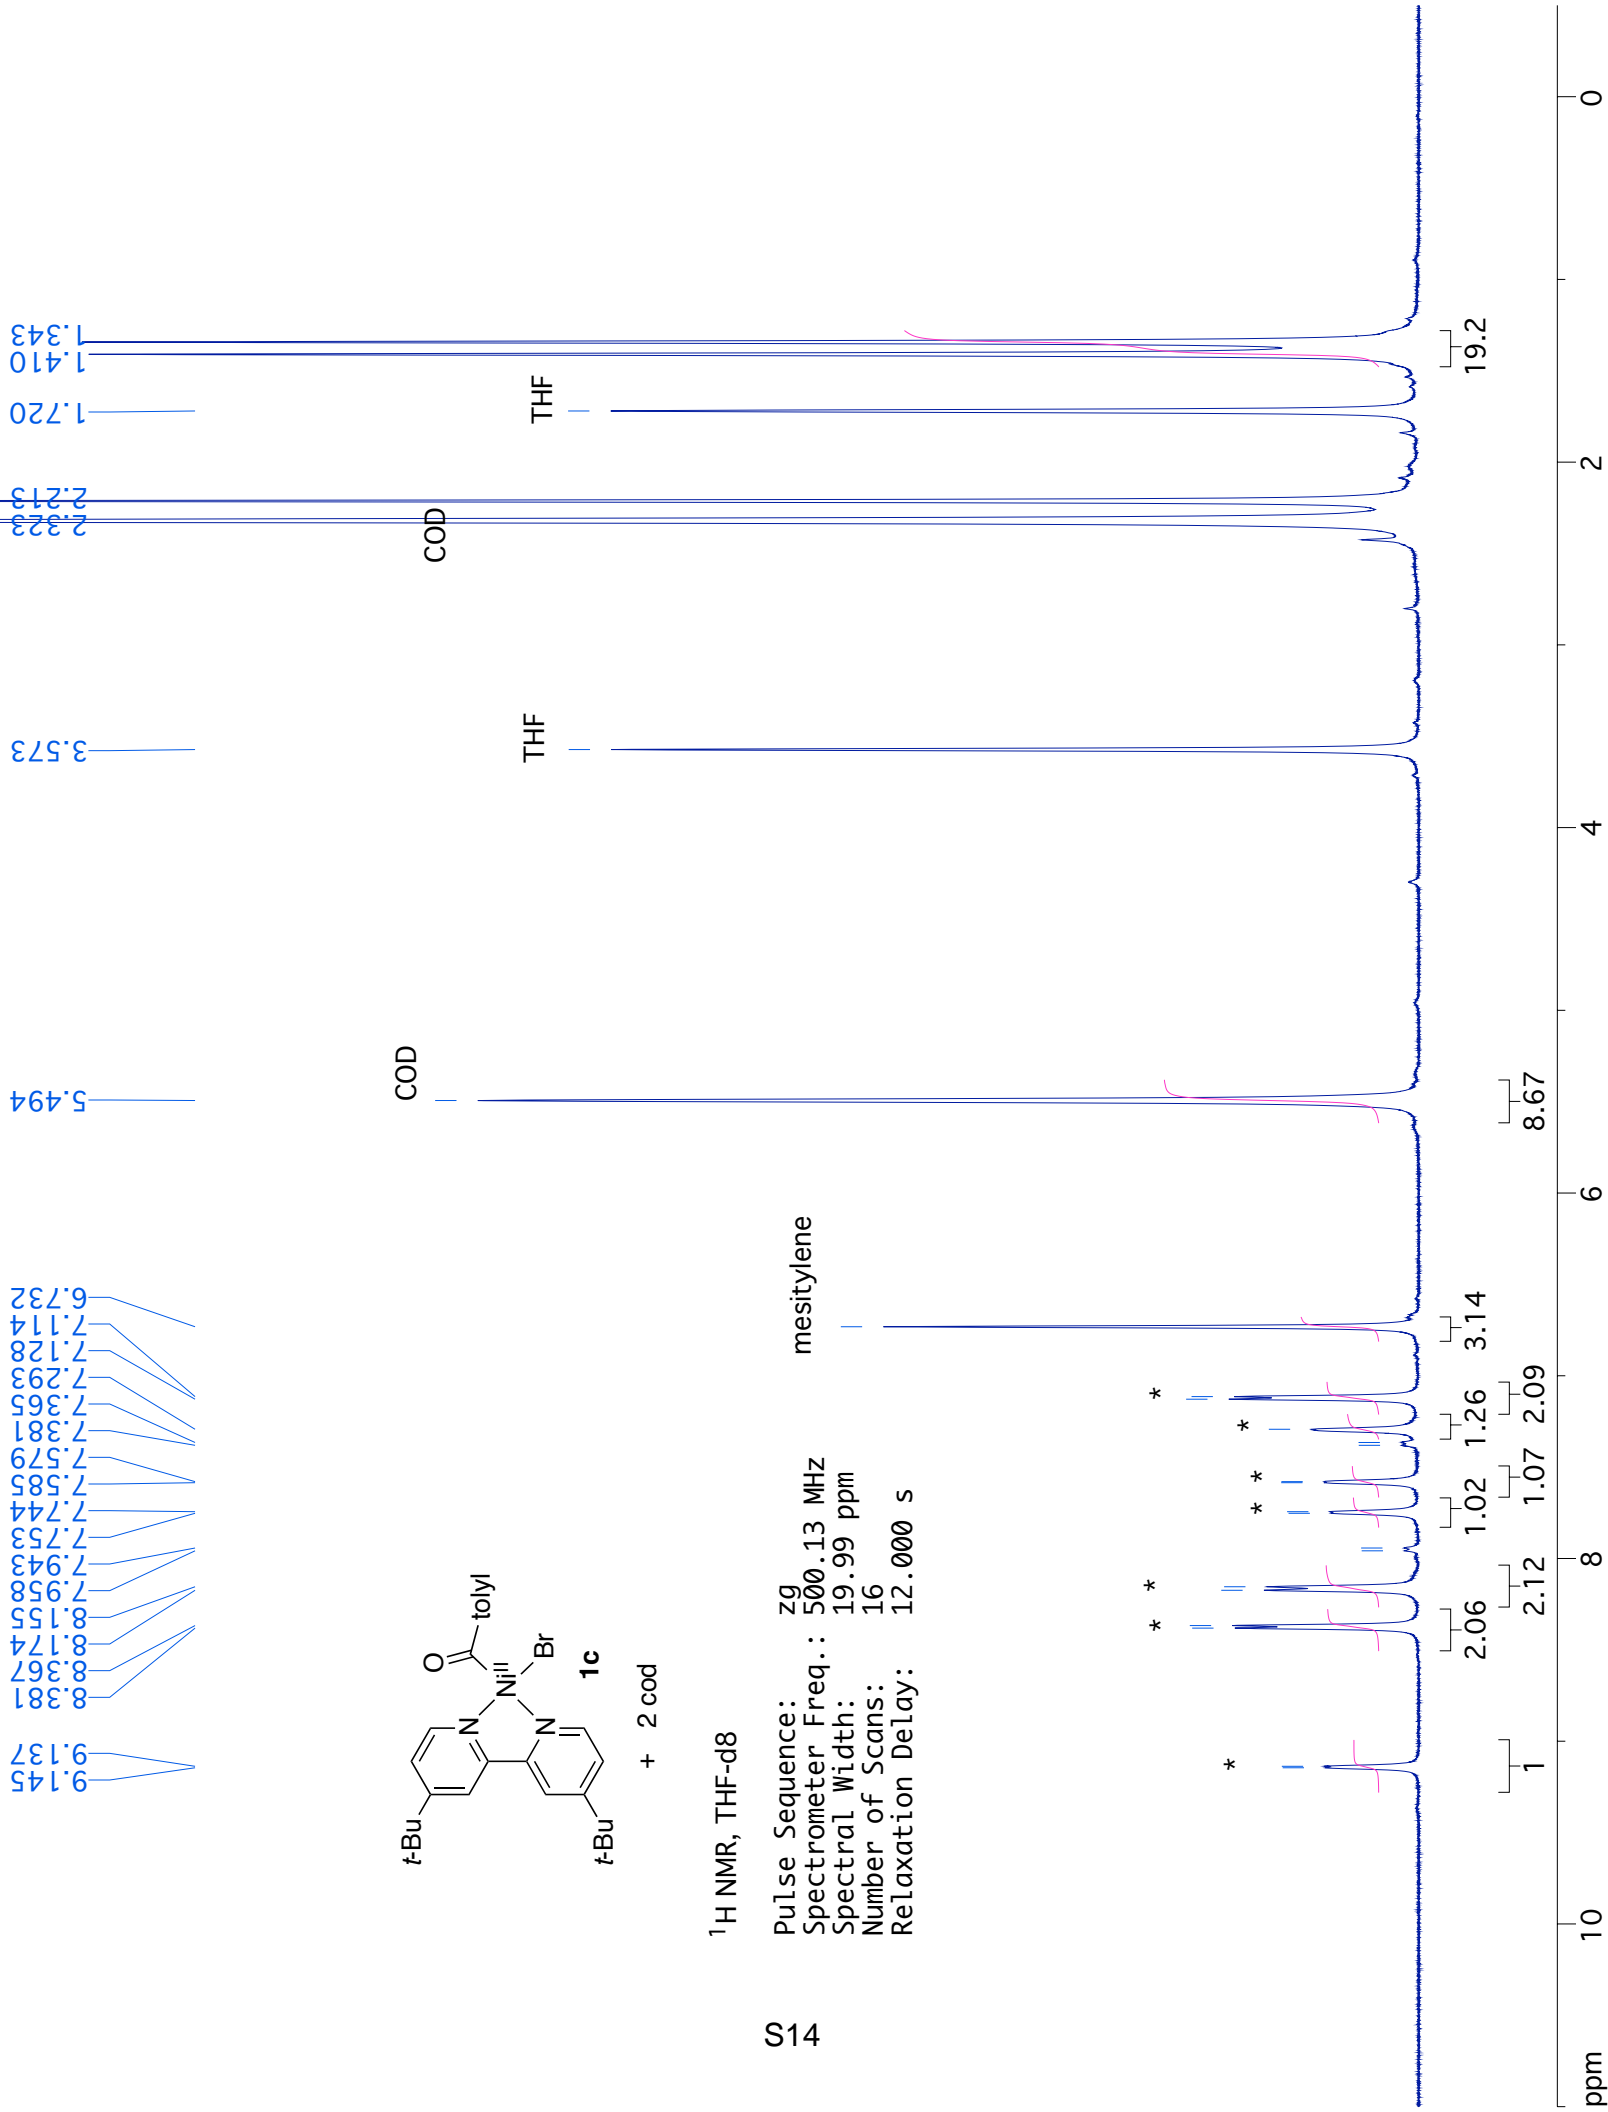

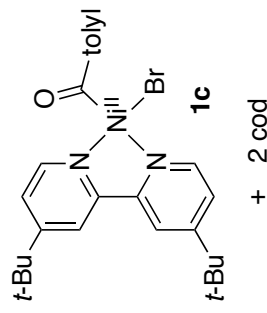

paramagnetic  $^1\text{H}$  NMR, THF-d8

S15

Pulse Sequence: zg  
Spectrometer Freq.: 500.10 MHz  
Spectral Width: 605.93 ppm  
Number of Scans: 32  
Relaxation Delay: 0.500 s

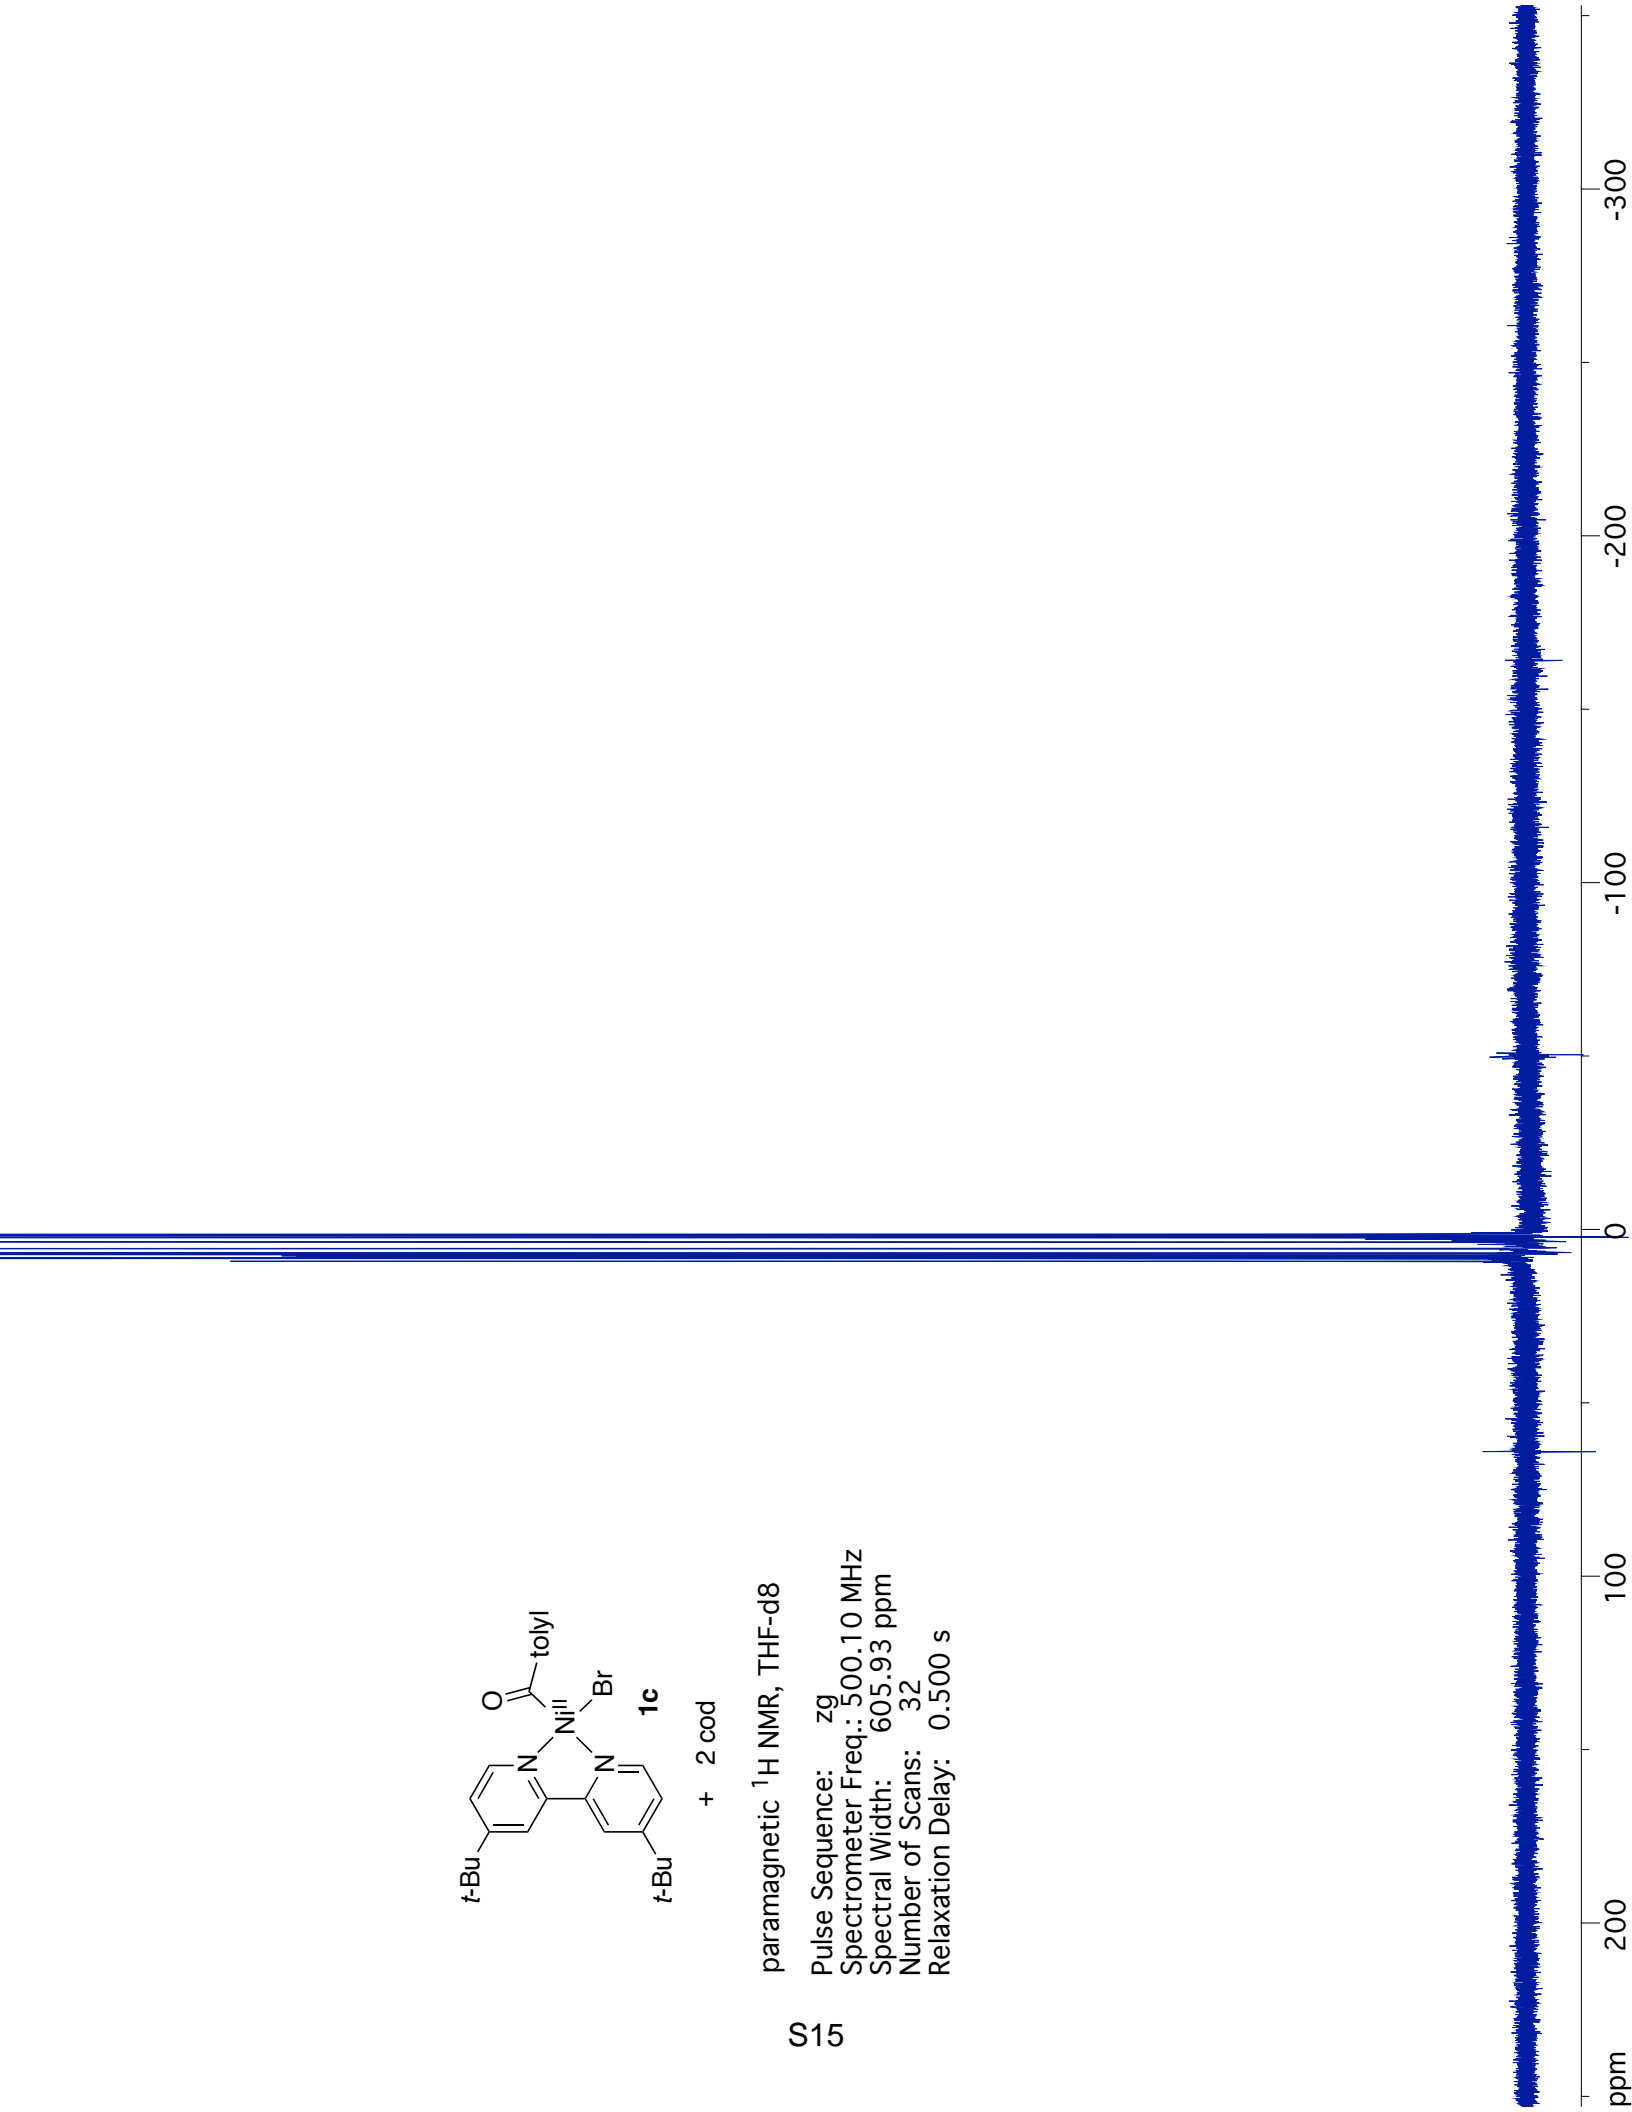

7.966  
7.951  
7.567  
7.552  
7.537  
7.470  
7.454  
7.439  
7.260

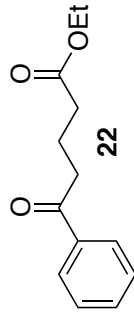

<sup>1</sup>H NMR, CDCl<sub>3</sub>

Pulse Sequence: zg  
Spectrometer Freq.: 500.13 MHz  
Spectral Width: 19.99 ppm  
Number of Scans: 4  
Relaxation Delay: 12.000 s

4.160  
4.146  
4.131  
4.117  
3.063  
3.049  
3.035  
2.443  
2.428  
2.414  
2.104  
2.089  
2.075  
2.061  
2.046  
1.266  
1.252  
1.237

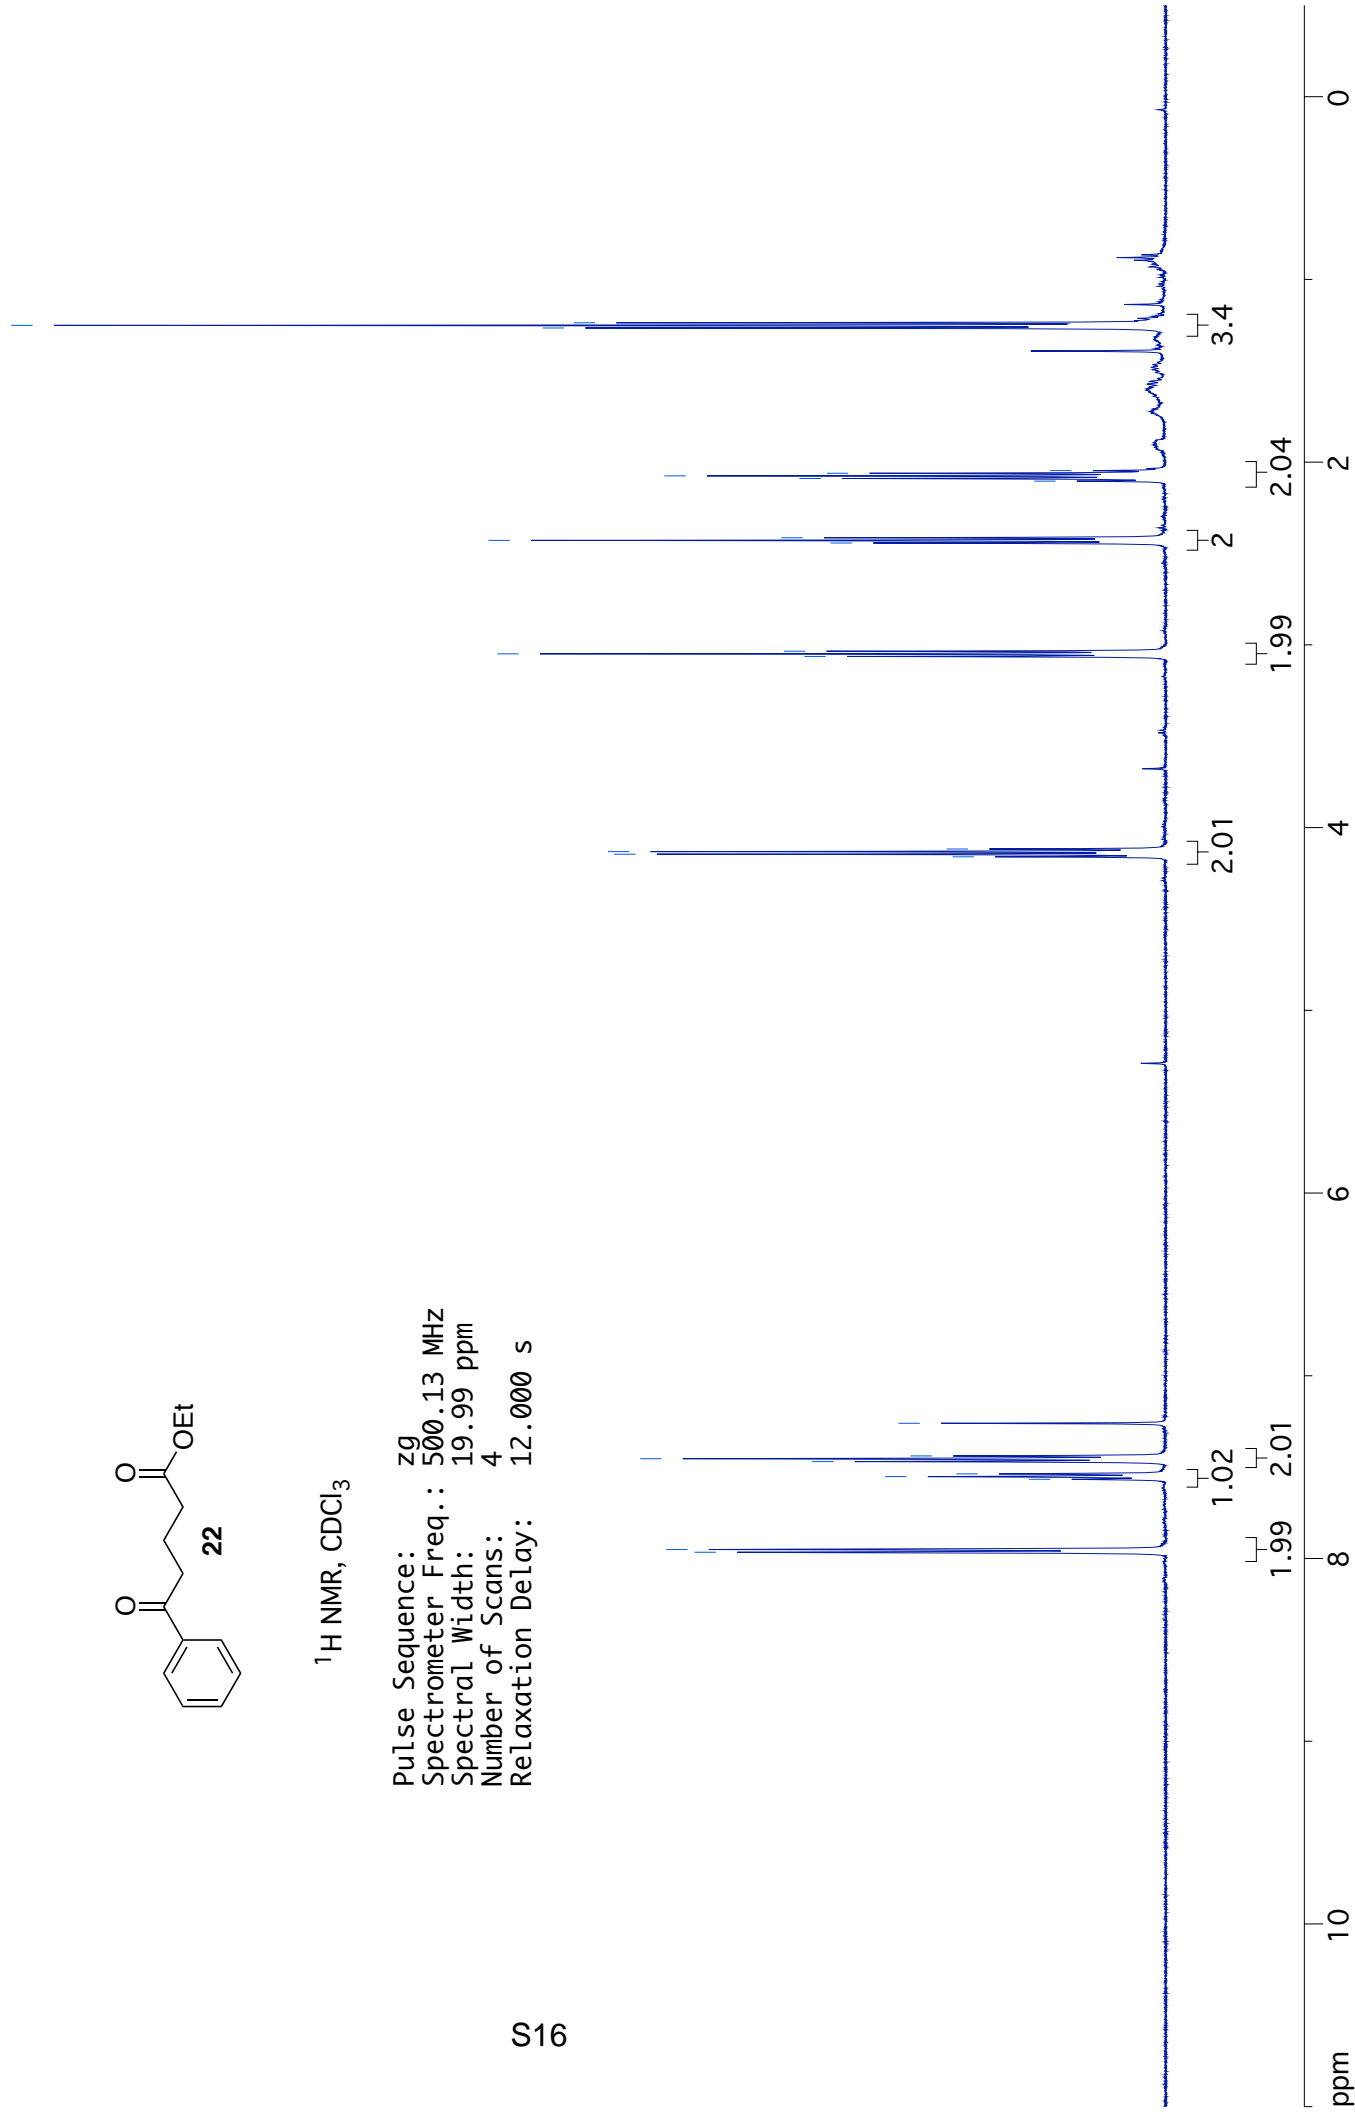



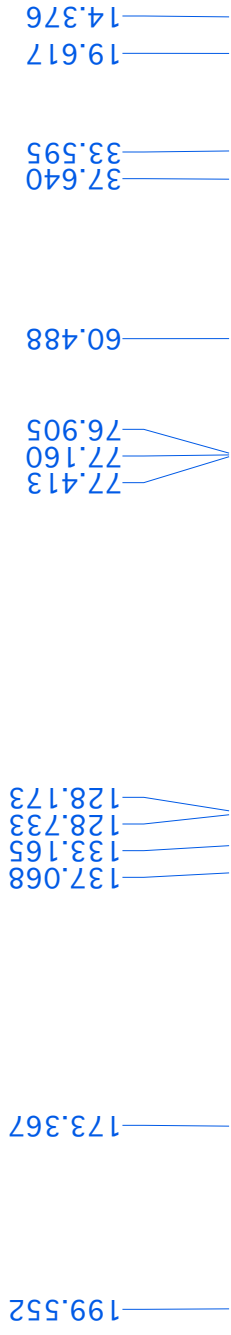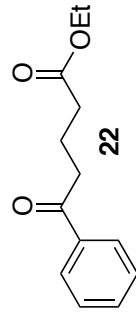

<sup>13</sup>C NMR, CDCl<sub>3</sub>

Pulse Sequence: zgdc  
Spectrometer Freq.: 125.77 MHz  
Spectral Width: 301.18 ppm  
Number of Scans: 200  
Relaxation Delay: 2.000 s

S15

ppm

150

100

50

0

-50

1.240  
 1.254  
 1.269  
 2.032  
 2.046  
 2.060  
 2.075  
 2.089  
 2.411  
 2.426  
 2.440  
 3.008  
 3.022  
 3.037  
 4.160  
 4.145  
 4.131  
 4.117

7.911  
 7.894  
 7.441  
 7.424

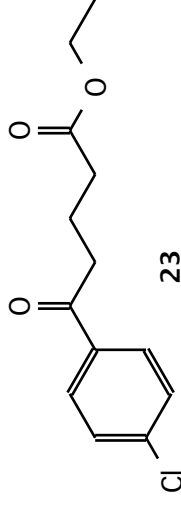

**23**  
**<sup>1</sup>H NMR, CDCl<sub>3</sub>**

Pulse Sequence: zg  
 Spectrometer Freq.: 500.13 MHz  
 Spectral Width: 19.99 ppm  
 Number of Scans: 5  
 Relaxation Delay: 10.000 s

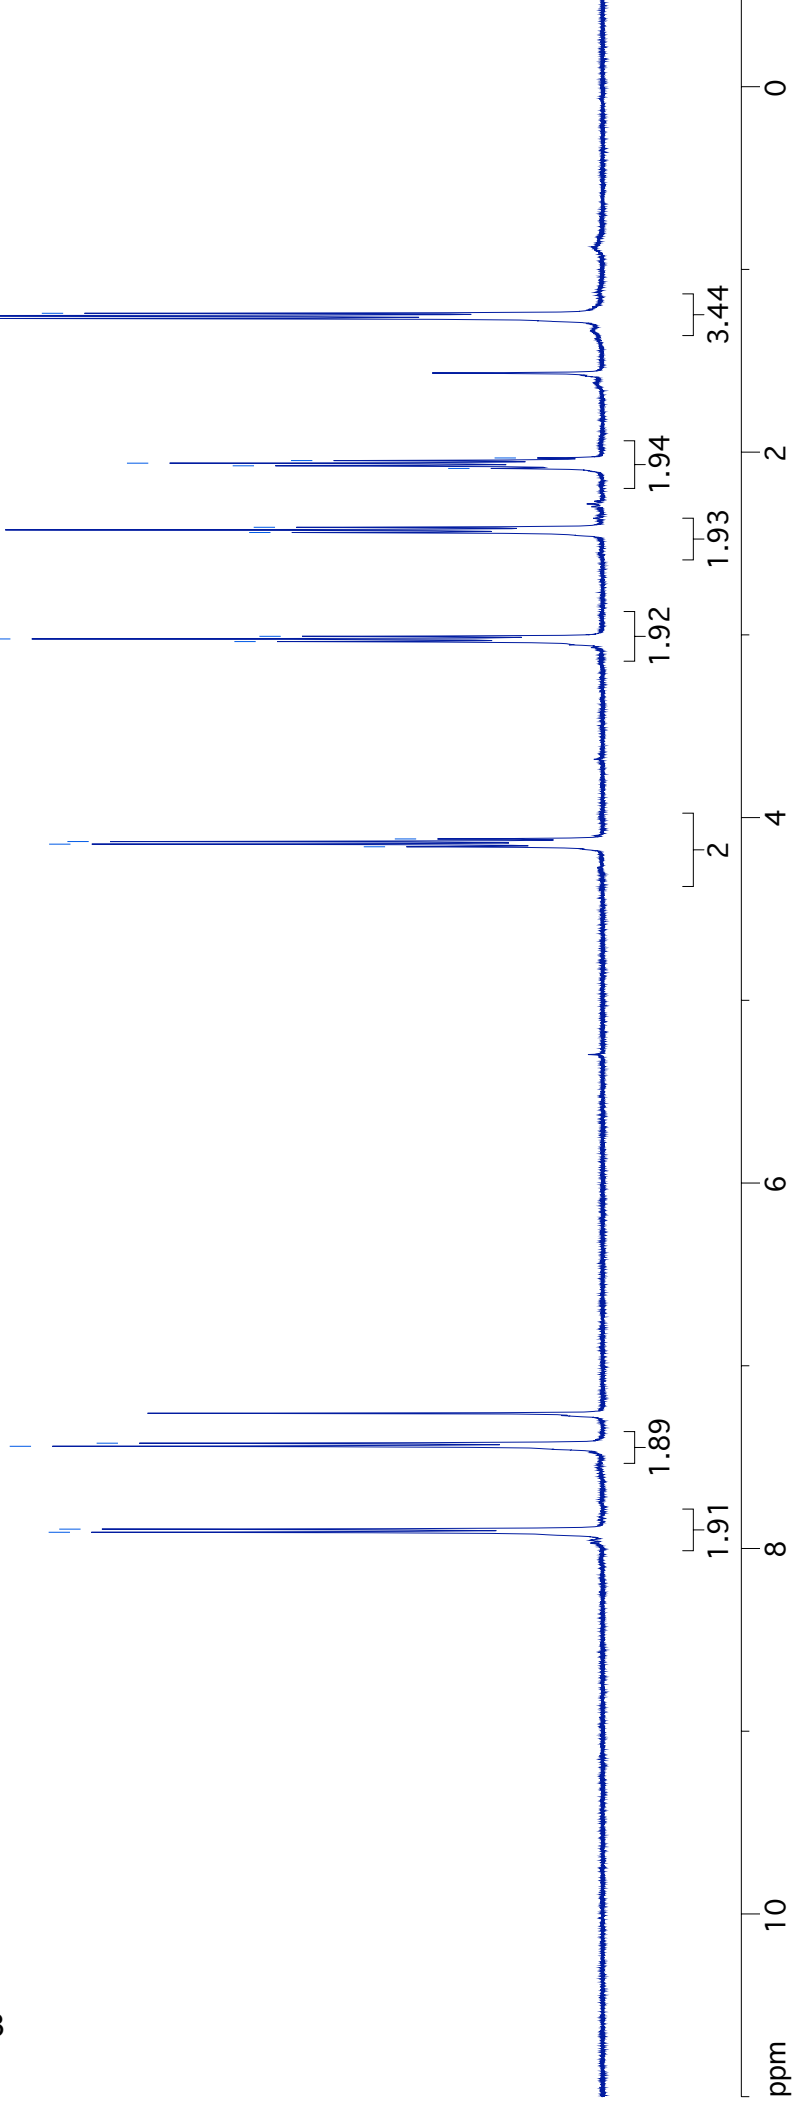

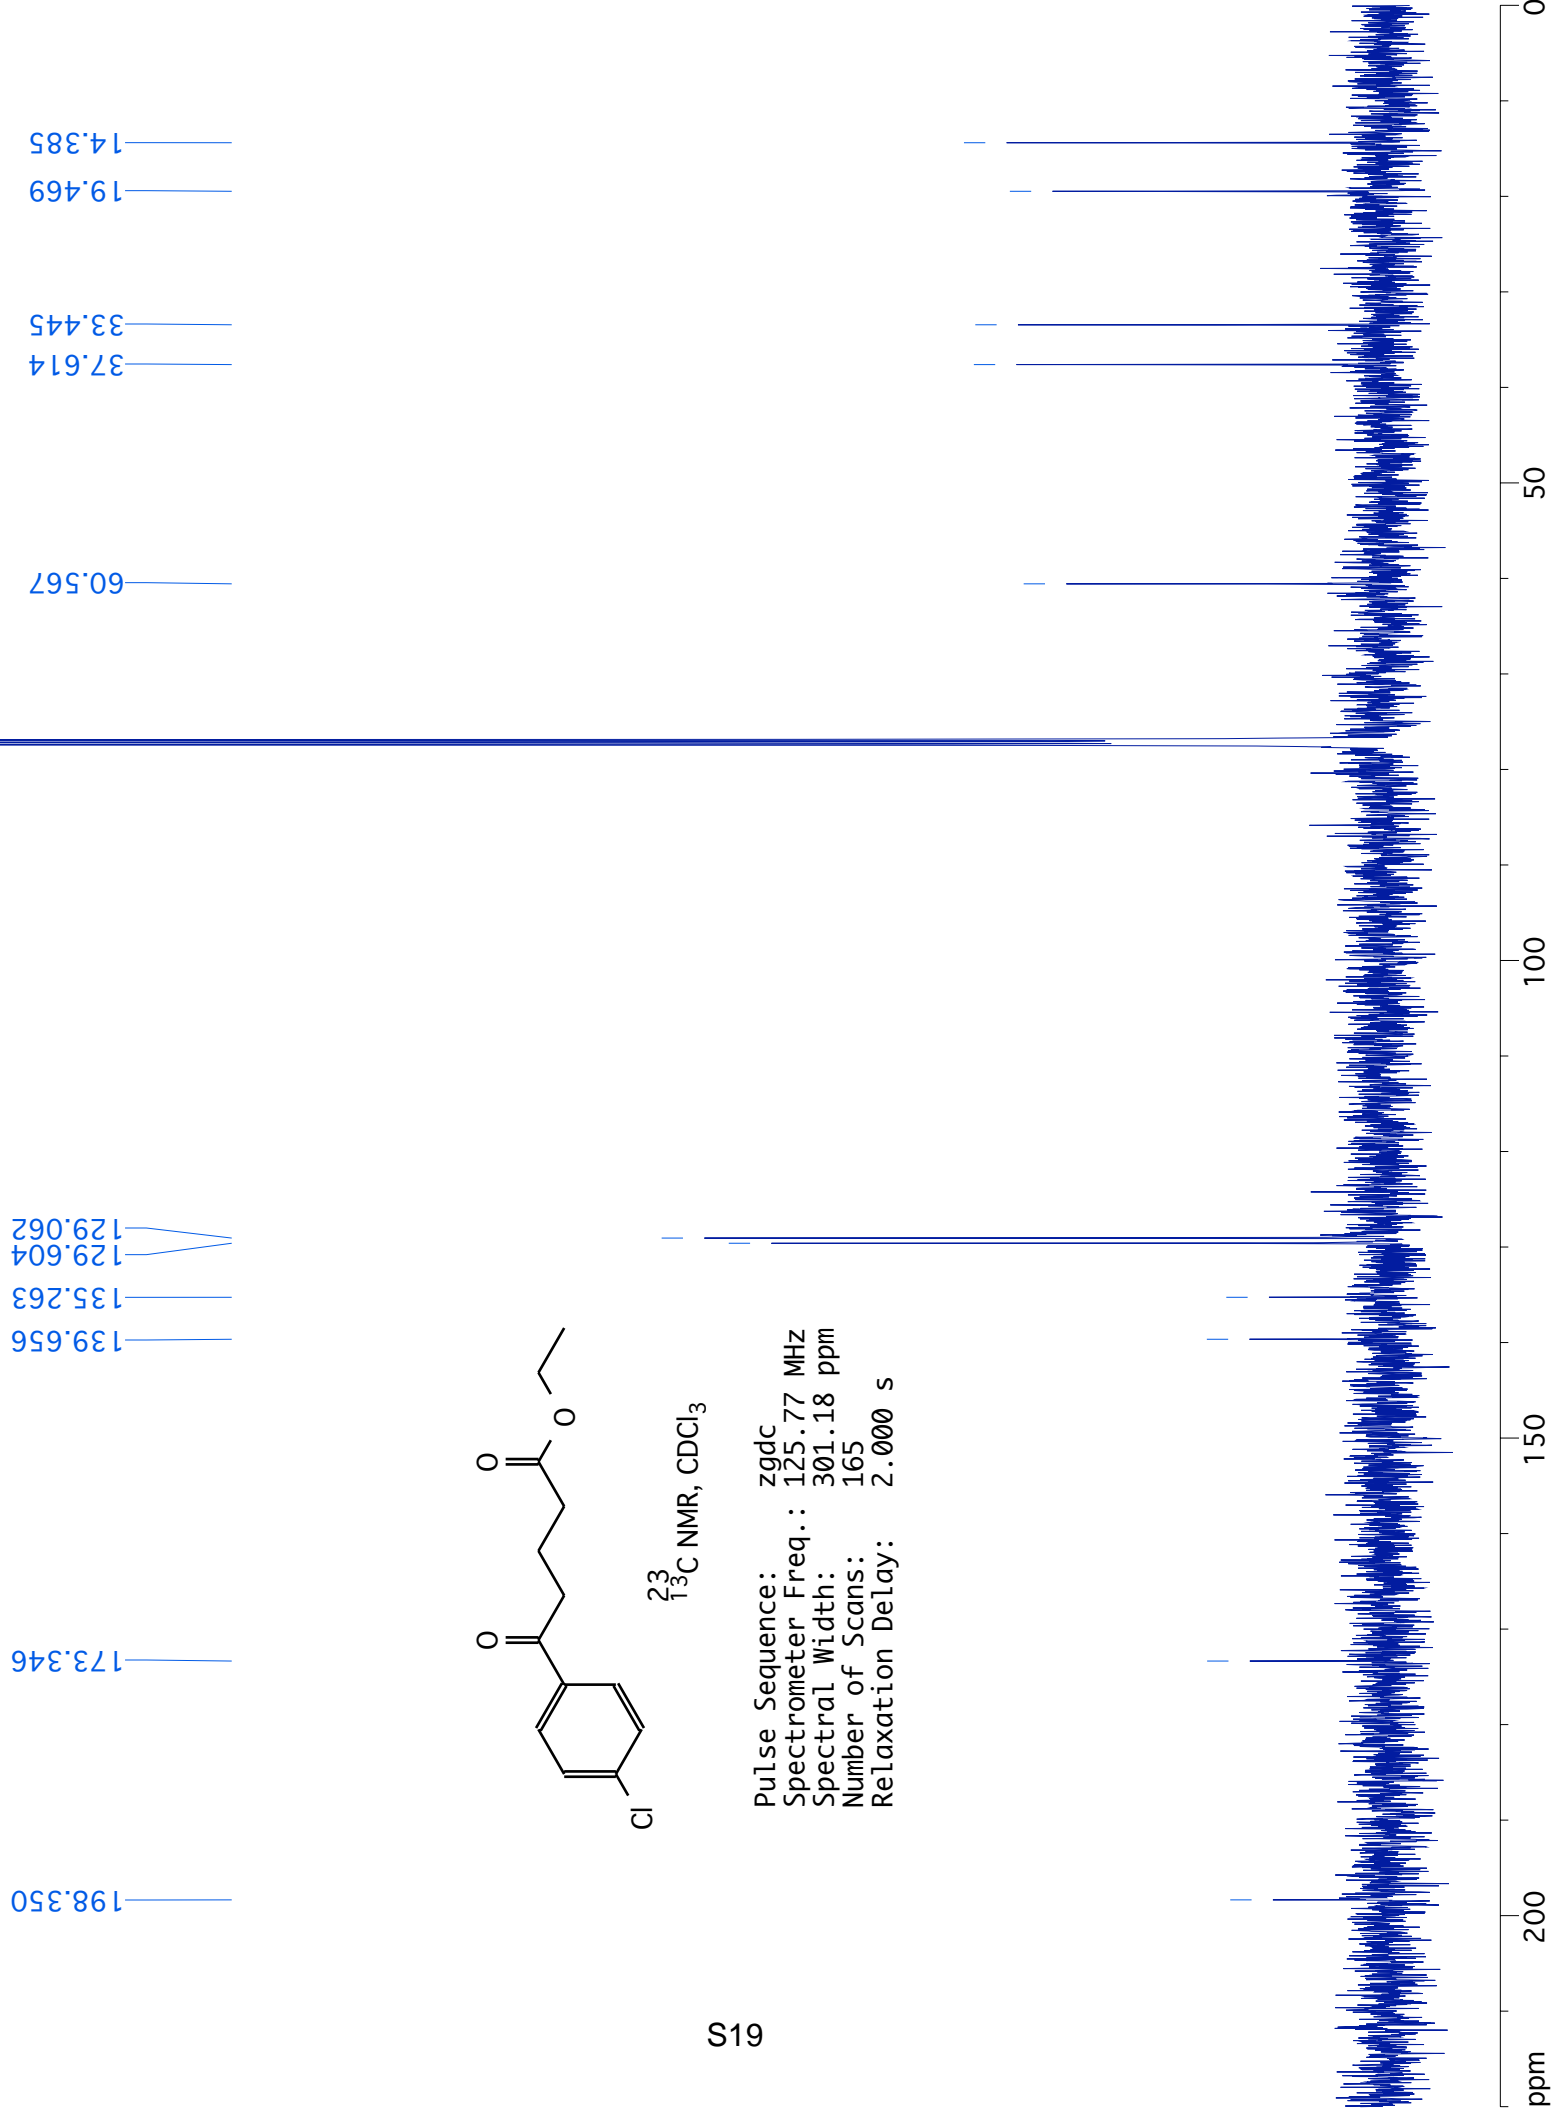

1.238  
 1.252  
 1.267  
 2.026  
 2.040  
 2.054  
 2.069  
 2.083  
 2.401  
 2.416  
 2.430  
 2.987  
 3.002  
 3.016

3.831  
 4.115  
 4.129  
 4.143  
 4.158

6.638  
 6.643  
 6.647  
 7.092  
 7.096

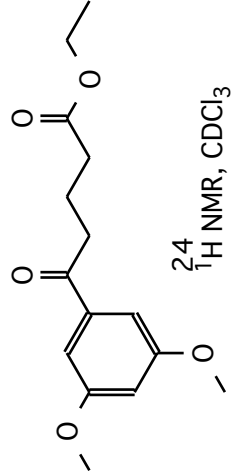

Pulse Sequence: zg  
 Spectrometer Freq.: 500.13 MHz  
 Spectral Width: 19.99 ppm  
 Number of Scans: 8  
 Relaxation Delay: 10.000 s

1.87  
 1.89  
 3.39  
 5.94  
 1.98

0.965  
 1.87

14.751  
20.000  
33.785  
38.001  
55.867  
60.622

105.847  
105.290

138.554

160.527  
172.806

198.549

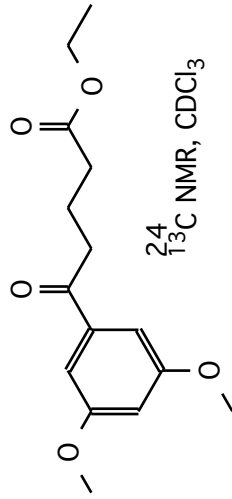

Pulse Sequence: zgdc  
Spectrometer Freq.: 100.60 MHz  
Spectral Width: 299.41 ppm  
Number of Scans: 93  
Relaxation Delay: 2.000 s

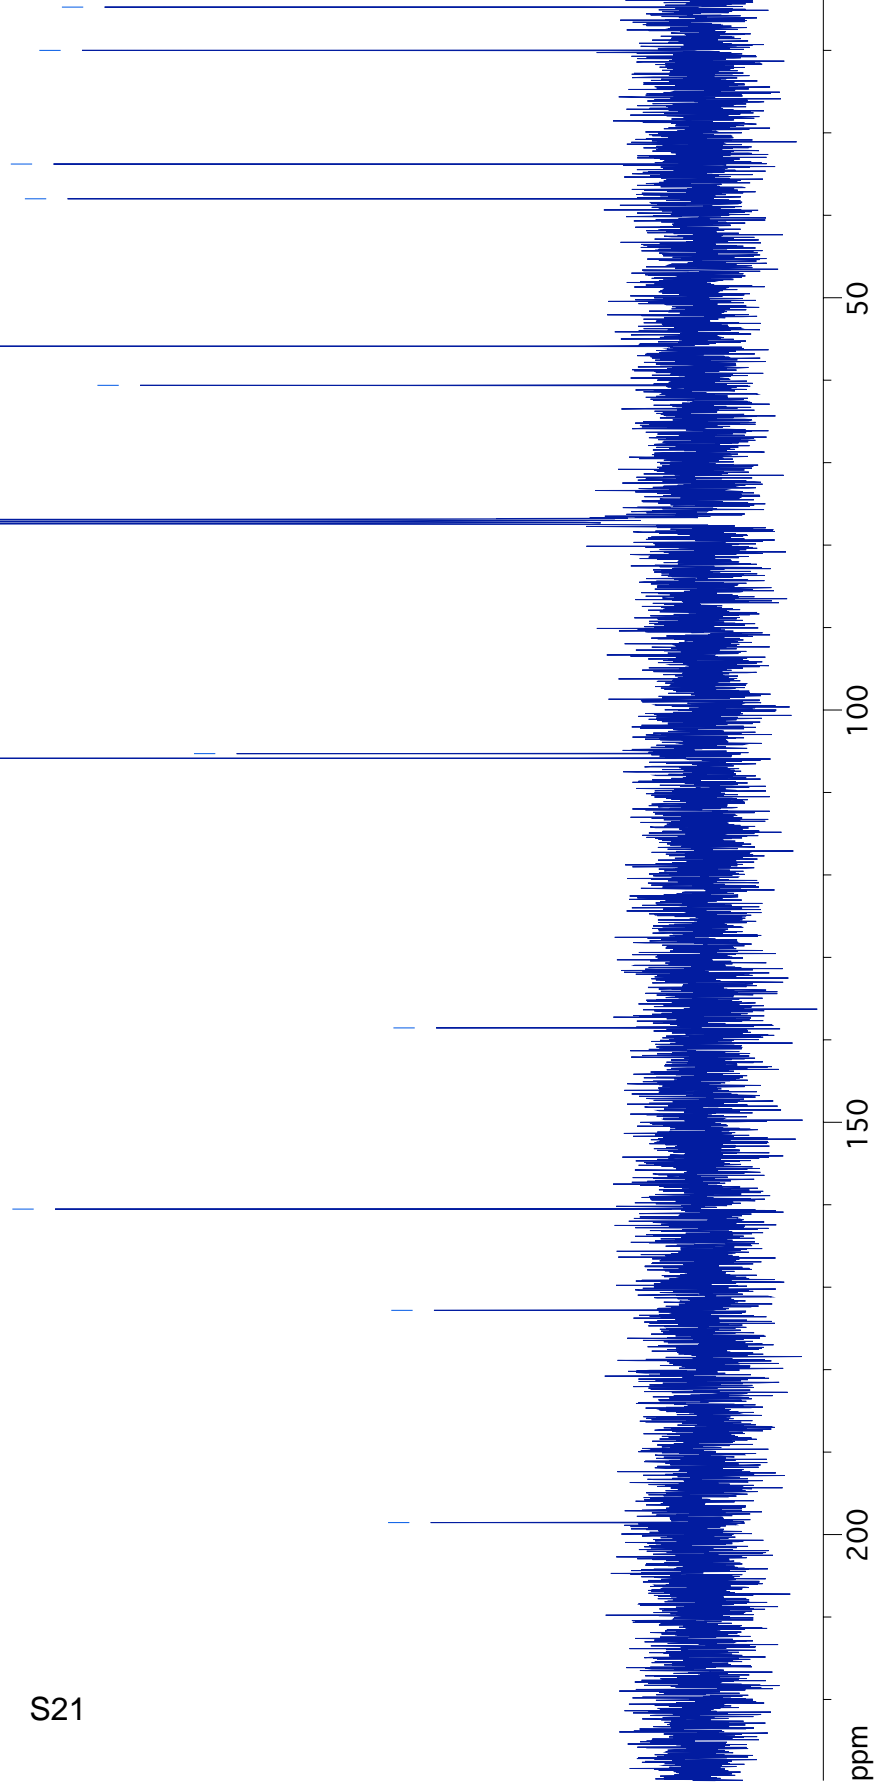

7.410  
7.403  
7.392  
7.385  
7.159  
7.152  
7.144  
7.141  
7.137  
7.134  
7.126  
7.119  
6.913  
6.905  
6.895  
6.887

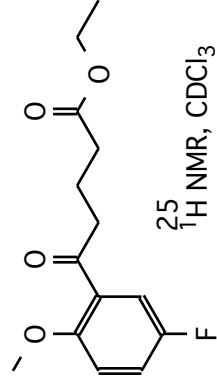

Pulse Sequence: zg  
Spectrometer Freq.: 400.05 MHz  
Spectral Width: 20.03 ppm  
Number of Scans: 8  
Relaxation Delay: 10.000 s

4.139  
4.125  
4.111  
4.096  
3.869  
3.036  
3.022  
3.008  
2.387  
2.372  
2.357  
2.029  
2.015  
2.001  
1.986  
1.972  
1.248  
1.233  
1.219

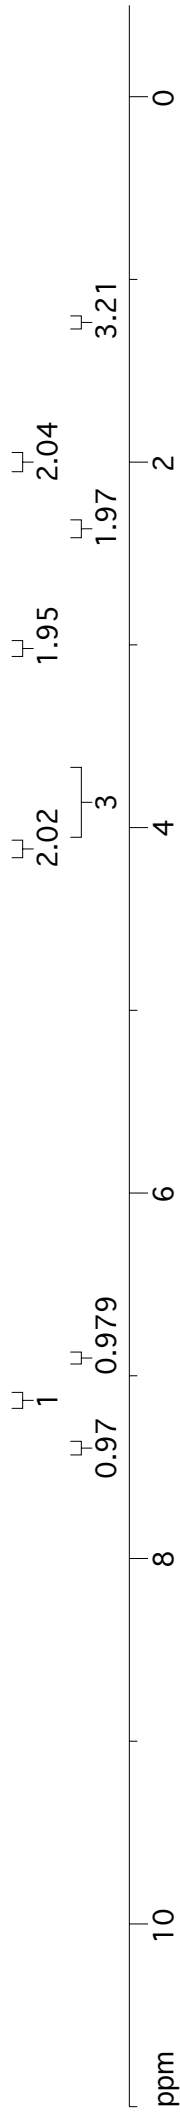

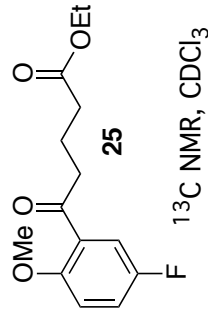

Pulse Sequence: zgdc  
 Spectrometer Freq.: 125.77 MHz  
 Spectral Width: 301.18 ppm  
 Number of Scans: 118  
 Relaxation Delay: 2.000 s

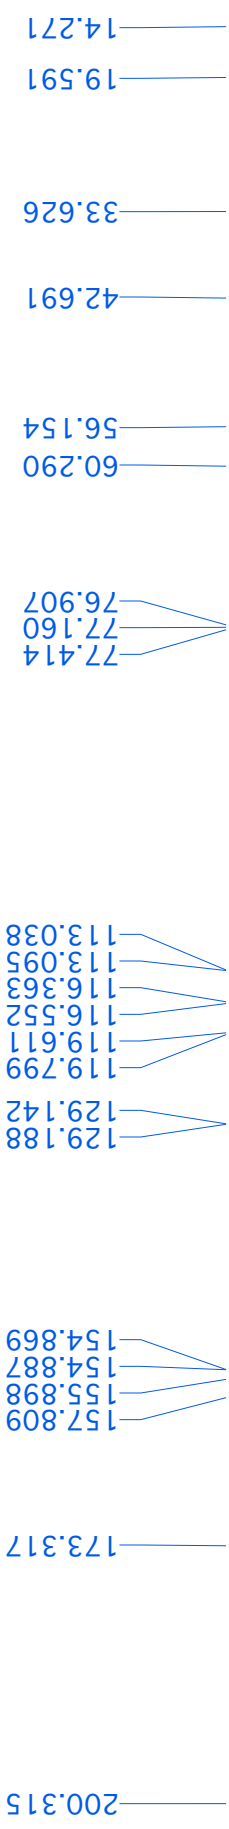

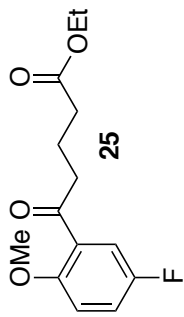

<sup>19</sup>F NMR, CDCl<sub>3</sub>

Pulse Sequence: zg  
Spectrometer Freq.: 376.48 MHz  
Spectral Width: 265.62 ppm  
Number of Scans: 4  
Relaxation Delay: 1.000 s

663.09



1.242  
 1.256  
 1.271  
 2.054  
 2.067  
 2.082  
 2.096  
 2.110  
 2.427  
 2.441  
 2.455  
 3.068  
 3.082  
 3.096  
 4.121  
 4.135  
 4.149  
 4.164

8.074  
 8.058  
 7.737  
 7.720

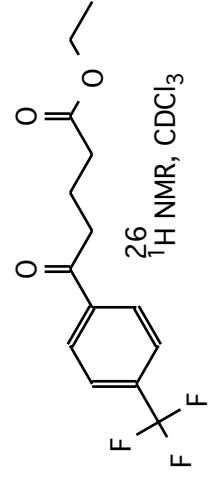

Pulse Sequence: zg  
 Spectrometer Freq.: 500.13 MHz  
 Spectral Width: 19.99 ppm  
 Number of Scans: 8  
 Relaxation Delay: 10.000 s

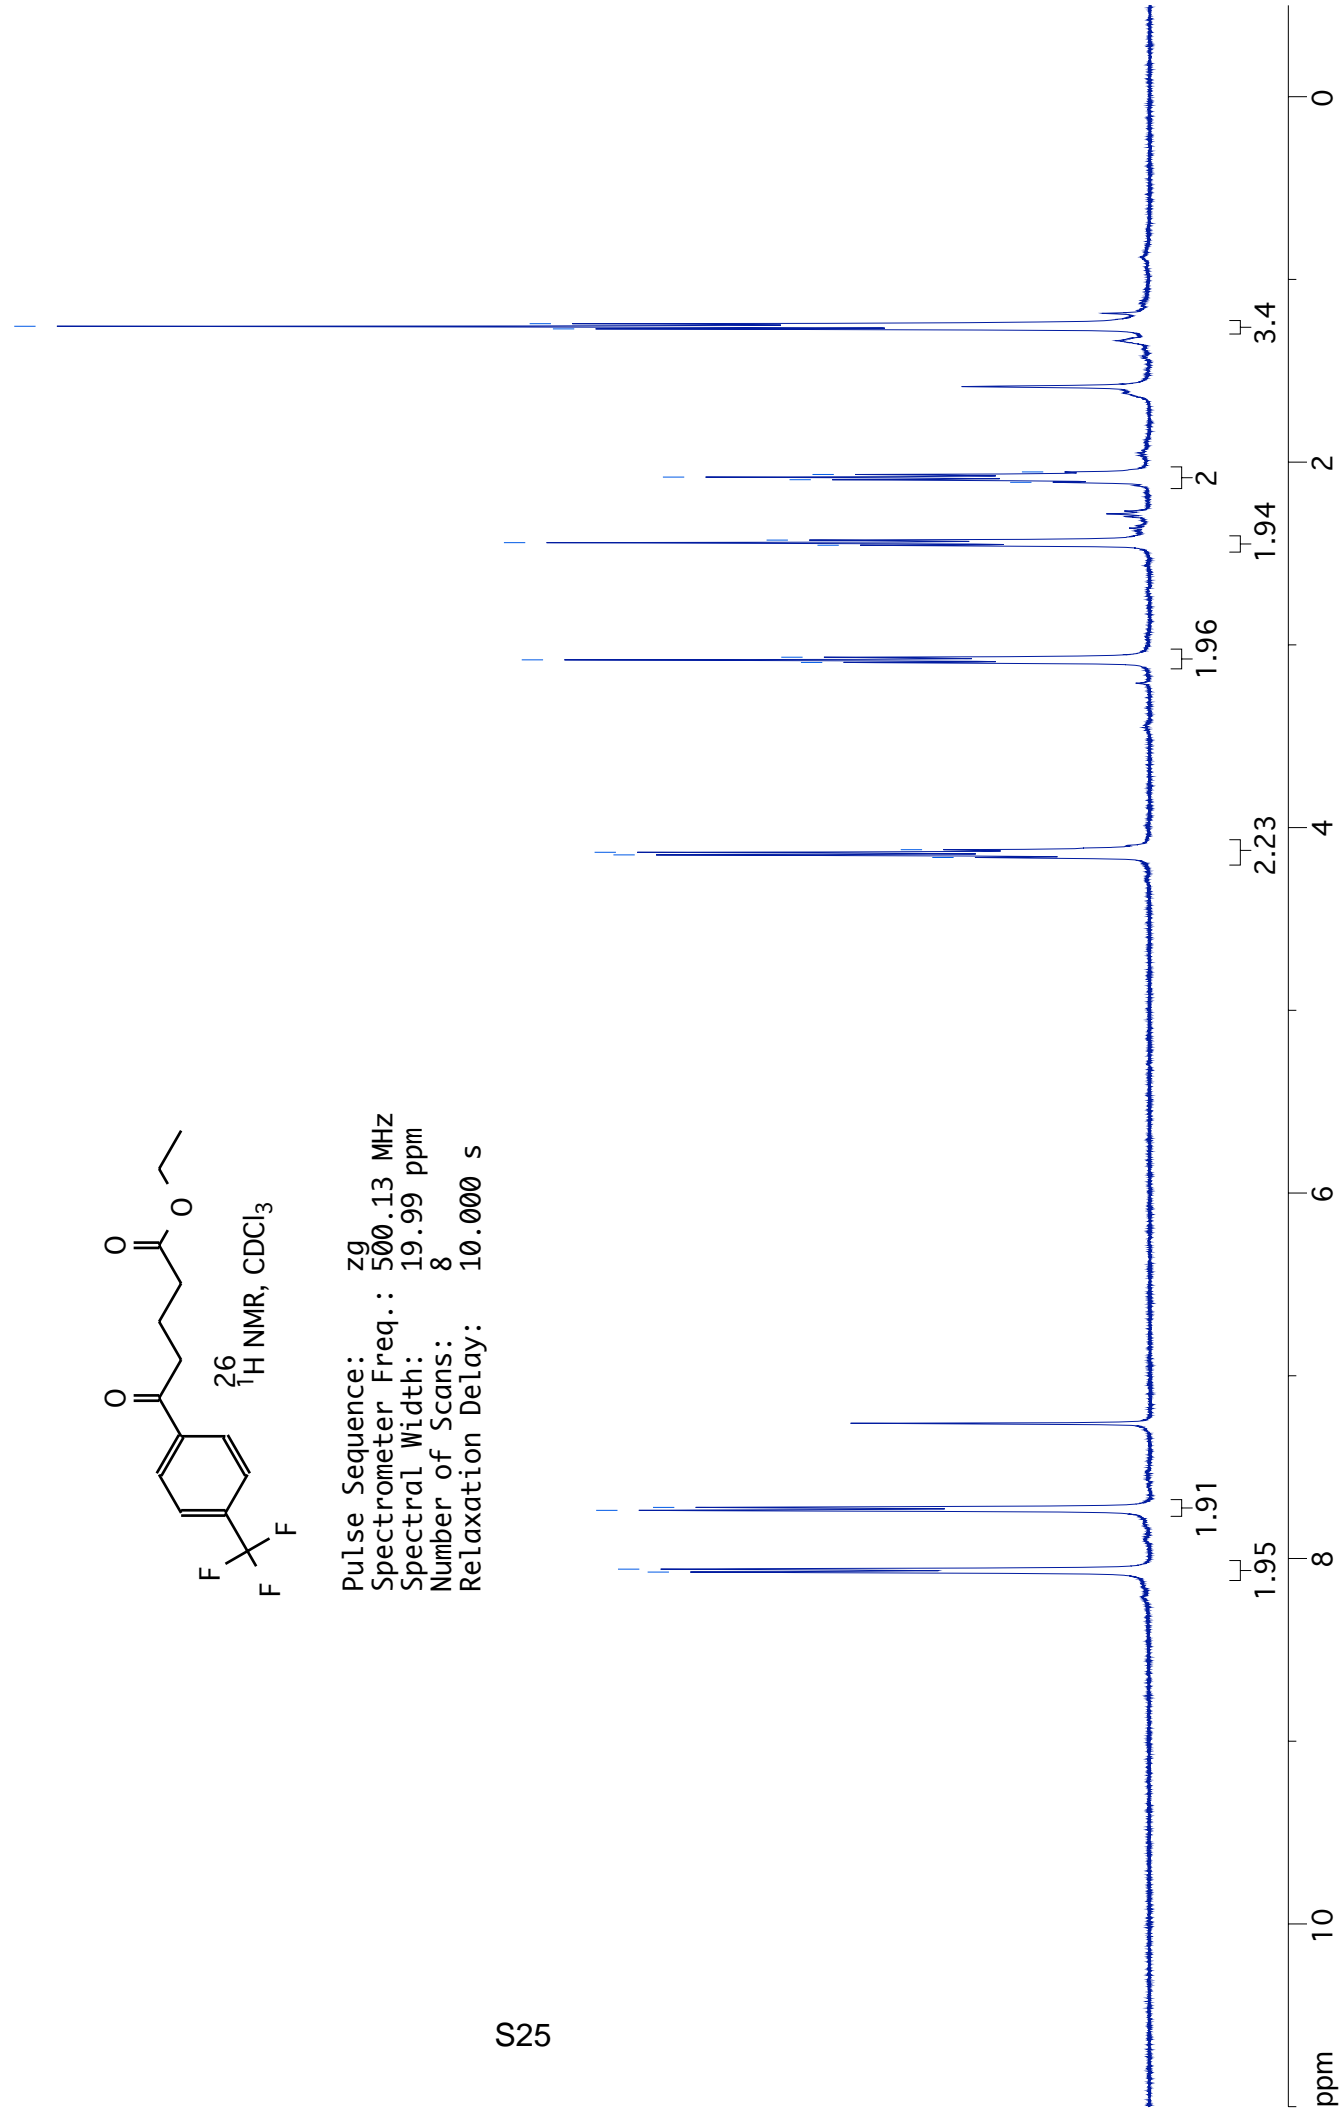

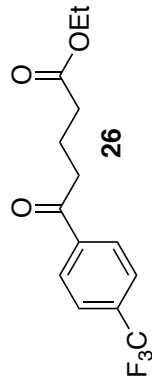

<sup>13</sup>C NMR, CDCl<sub>3</sub>

Pulse Sequence: zgdc  
Spectrometer Freq.: 100.60 MHz  
Spectral Width: 299.41 ppm  
Number of Scans: 1461  
Relaxation Delay: 2.000 s

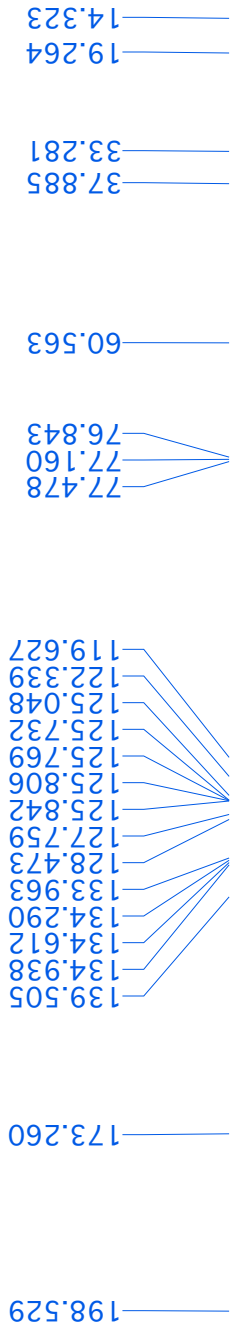

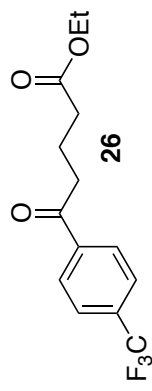

<sup>19</sup>F NMR, CDCl<sub>3</sub>

Pulse Sequence: zg  
Spectrometer Freq.: 376.50 MHz  
Spectral Width: 199.70 ppm  
Number of Scans: 4  
Relaxation Delay: 1.000 s

-0.035

ppm

150

100

50

-0

7.970  
7.955  
7.551  
7.536  
7.521  
7.457  
7.442  
7.426

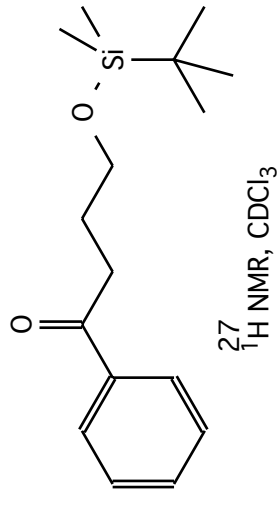

Pulse Sequence: zg  
Spectrometer Freq.: 500.13 MHz  
Spectral Width: 19.99 ppm  
Number of Scans: 8  
Relaxation Delay: 12.000 s

3.710  
3.698  
3.686  
3.063  
3.049  
3.034  
1.973  
1.960  
1.946  
1.933  
1.920  
-0.879  
0.031

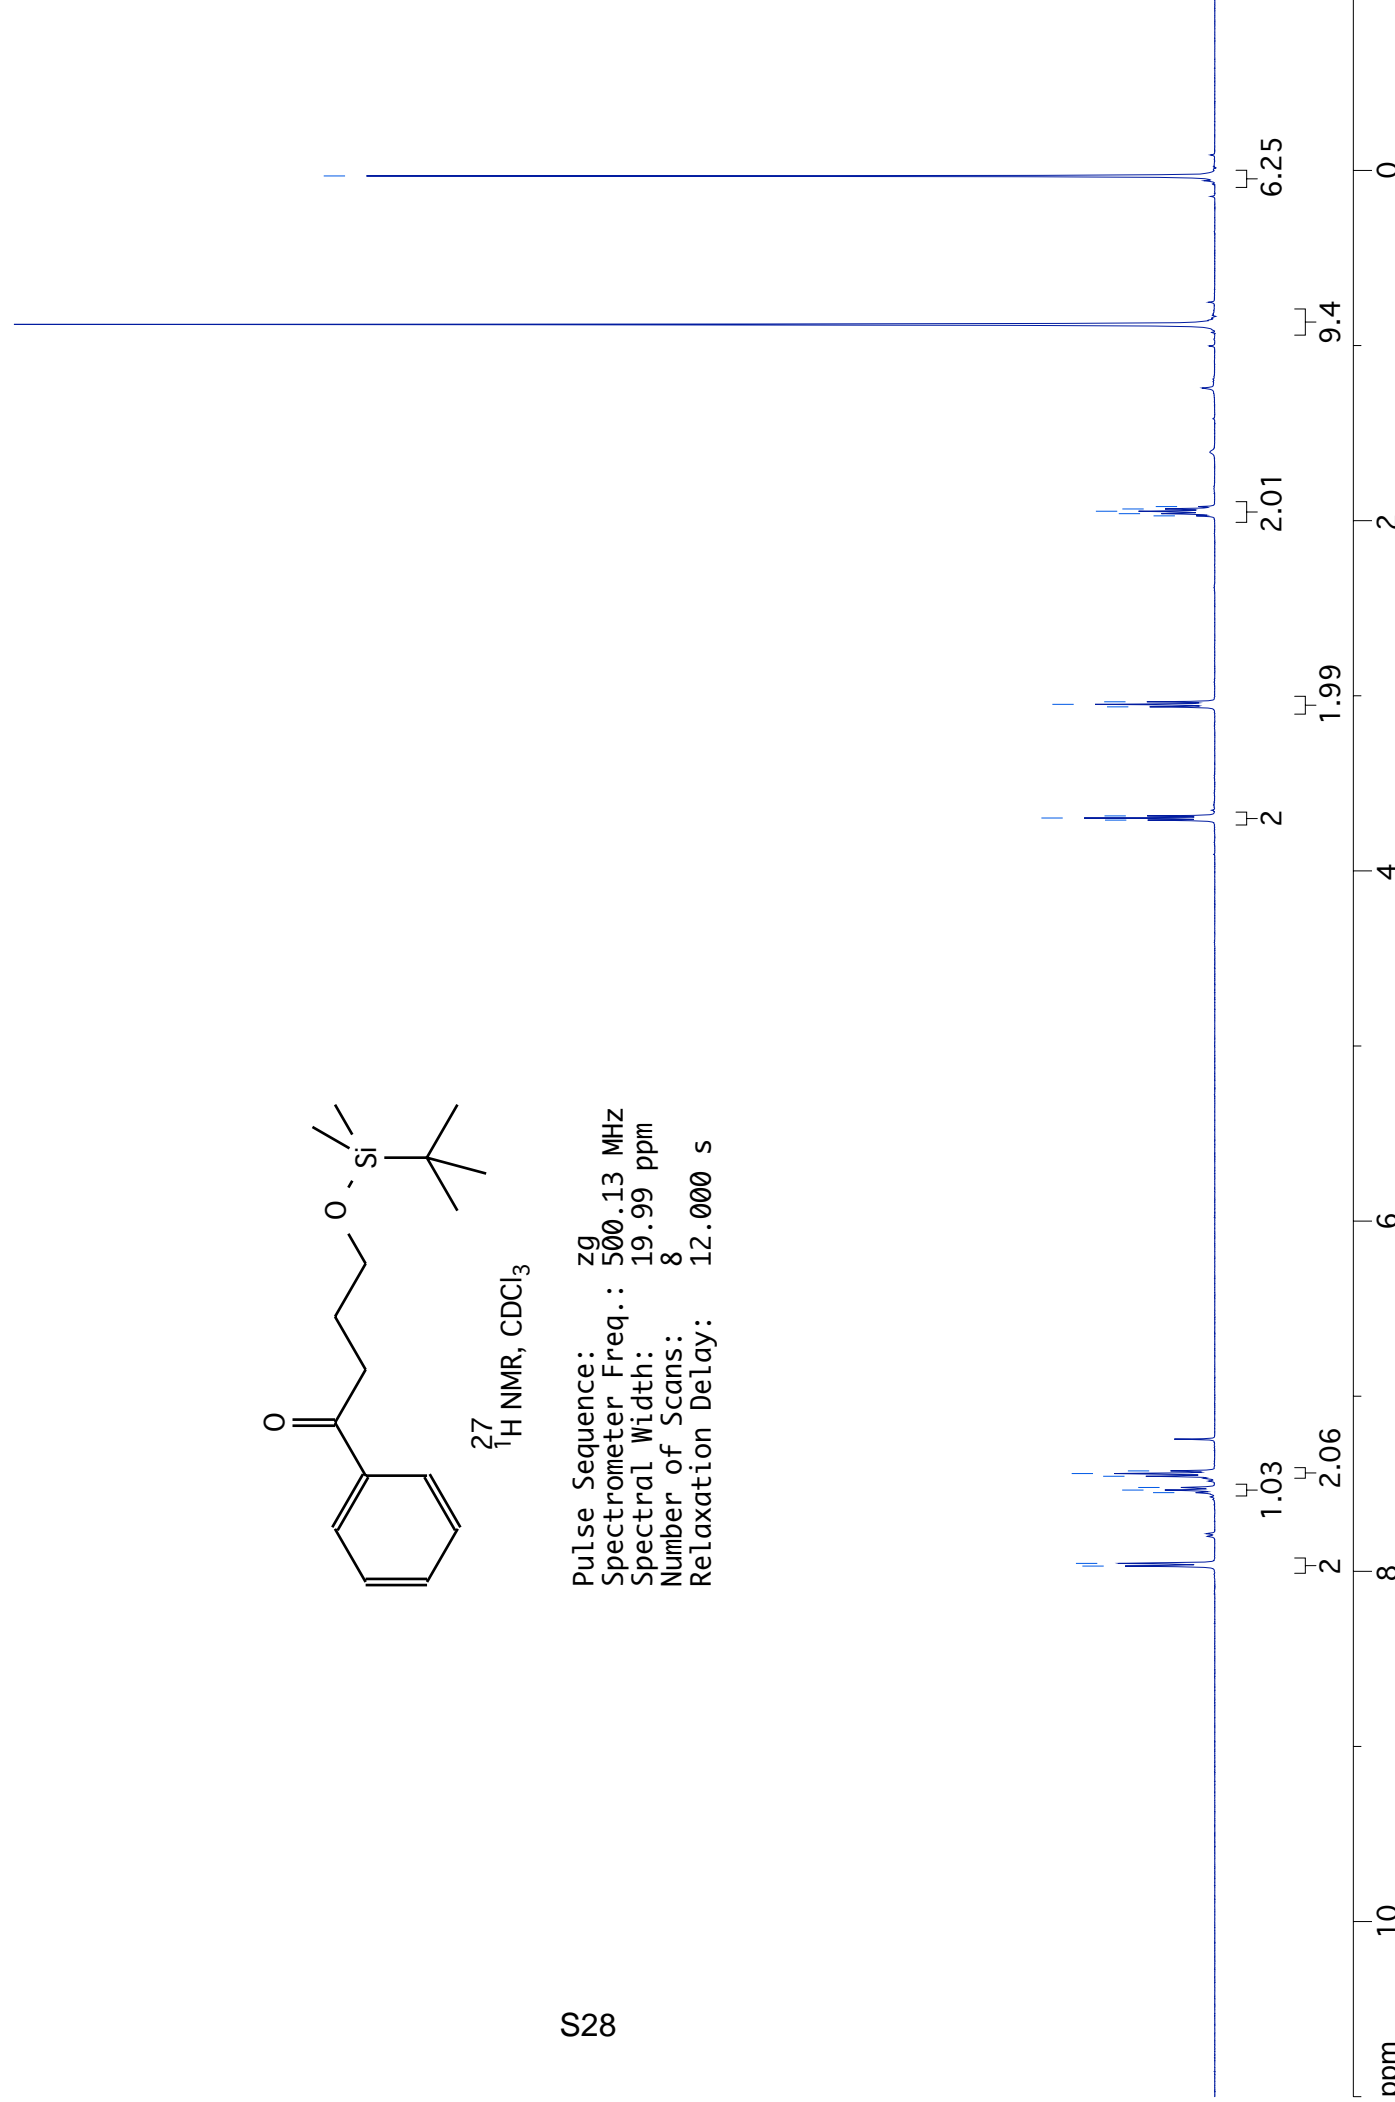

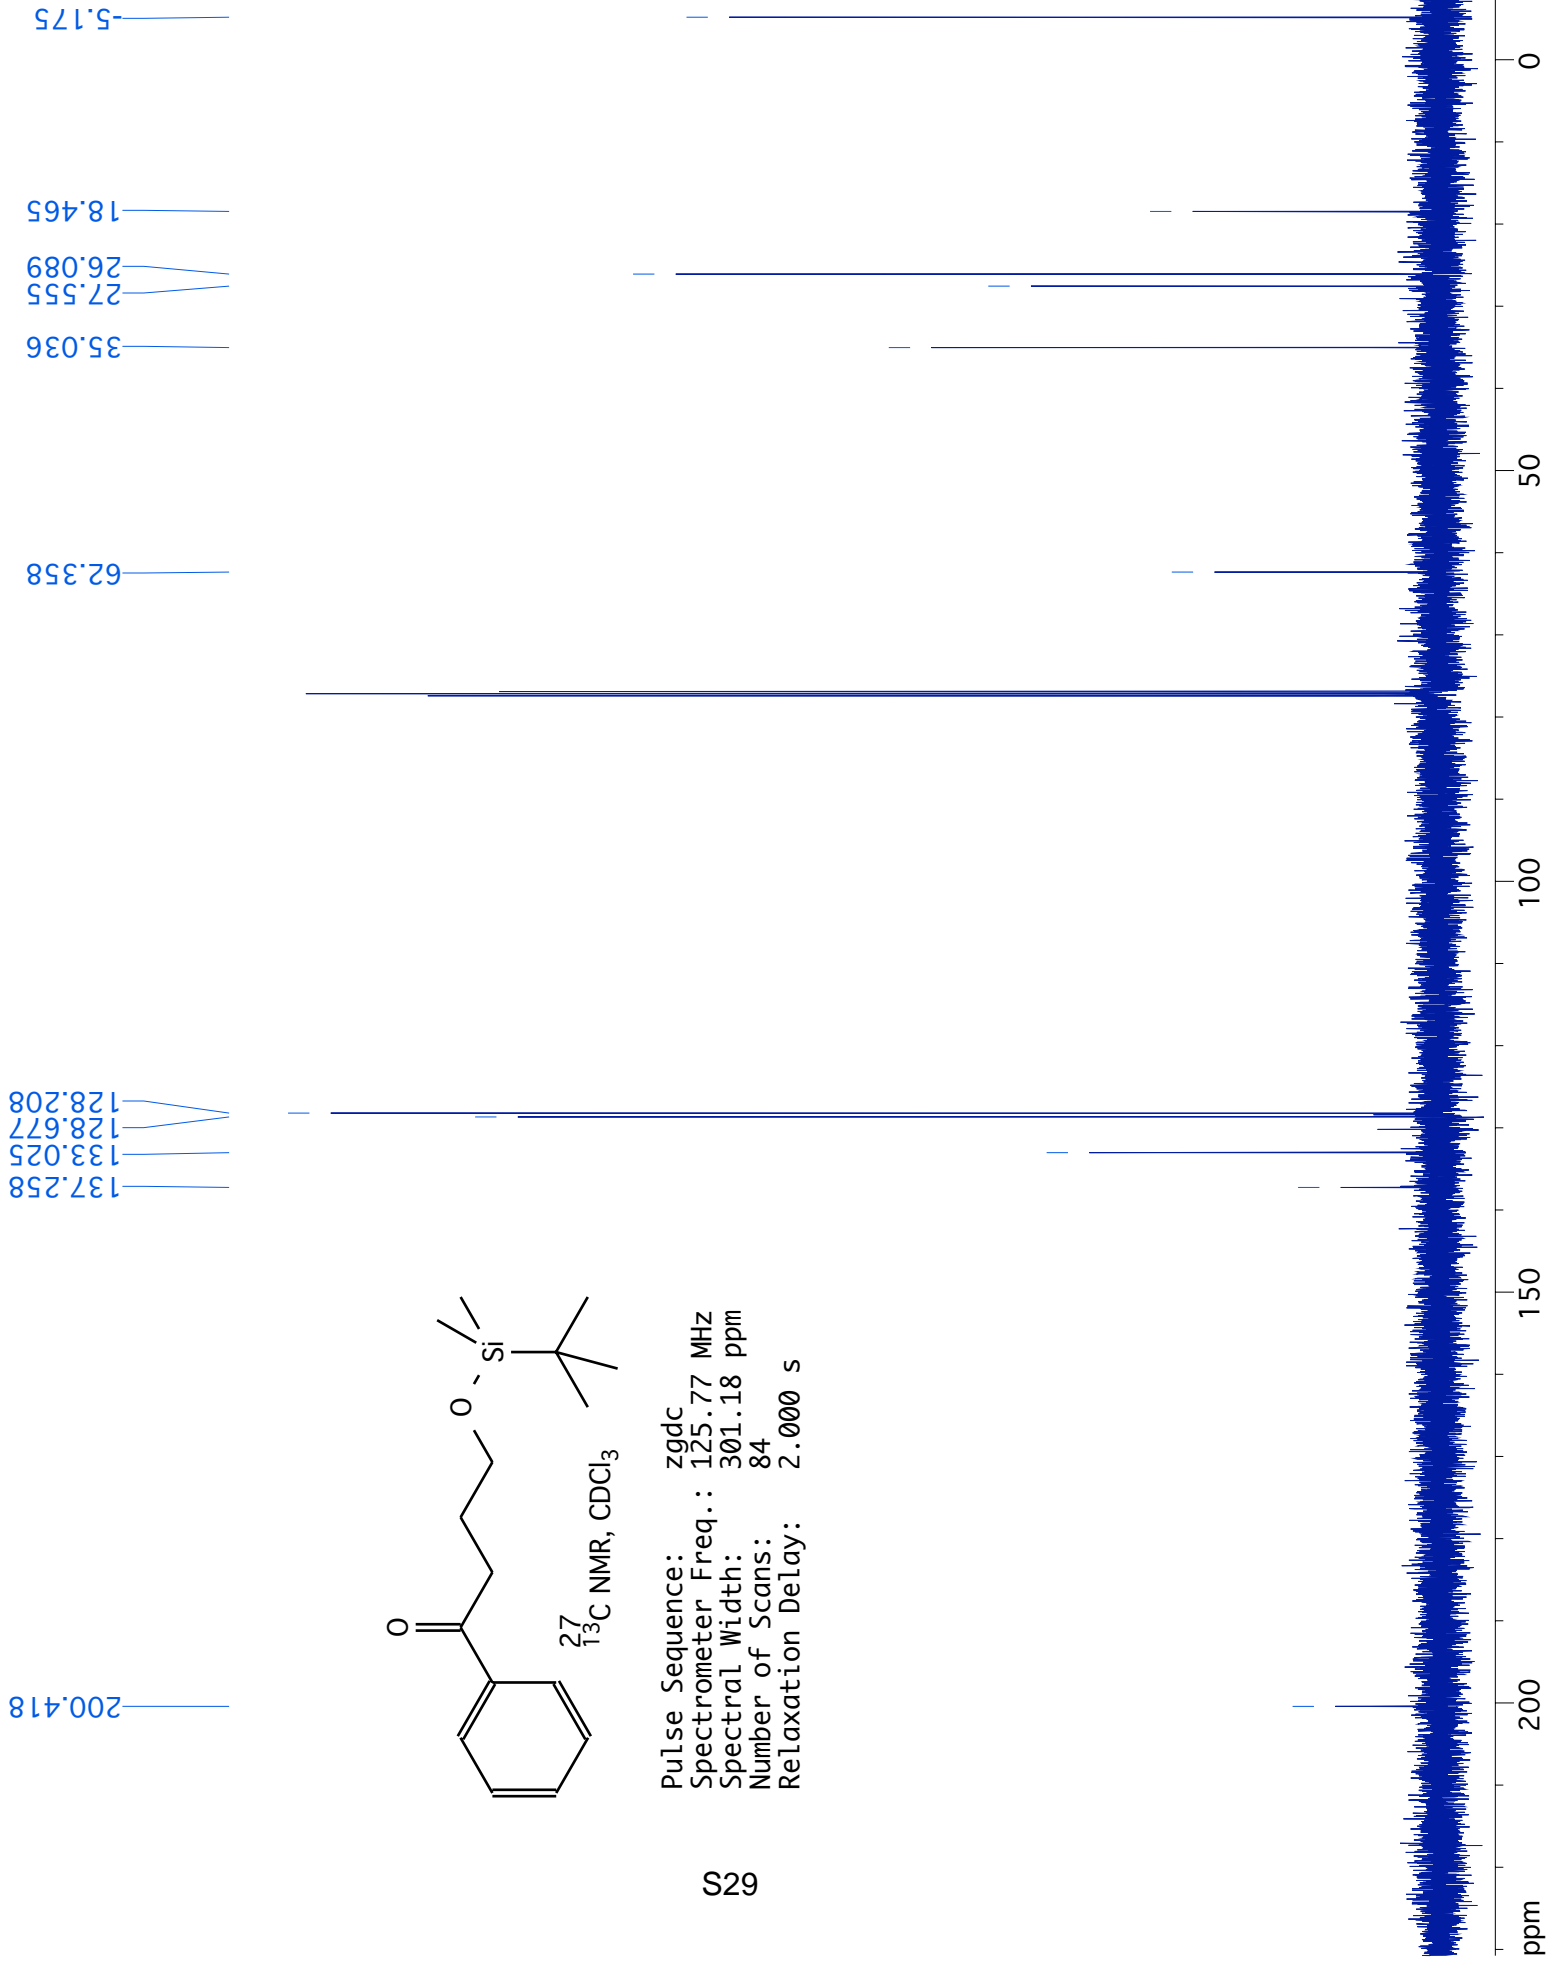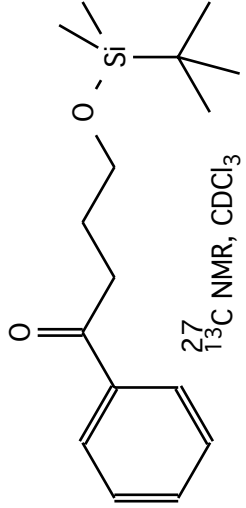

Pulse Sequence: zgdc  
 Spectrometer Freq.: 125.77 MHz  
 Spectral Width: 301.18 ppm  
 Number of Scans: 84  
 Relaxation Delay: 2.000 s
